# Supplementary material
Source: PubMed Central journal article supplement (PMC7757006)

**Supplemental Figure 1. Genomes analyzed**

| Group                                  | Subdivision                           | Species (Common Name)                                          | <i>Klkb1</i> | <i>F11</i> | <i>F12</i> | <i>HGFAC</i> | <i>HK</i> |
|----------------------------------------|---------------------------------------|----------------------------------------------------------------|--------------|------------|------------|--------------|-----------|
| Jawless Fish<br>(Agnatha)              |                                       | <i>Eptatretus burgeri</i> (Inshore Hagfish)                    | -            | -          | -          | ?            | -         |
|                                        |                                       | <i>Eptatretus stoutii</i> (Pacific Hagfish)                    | -            | -          | -          | ?            | -         |
|                                        |                                       | <i>Lethenteron camtschaticum</i> (Arctic Lamprey)              | -            | -          | -          | ?            | -         |
|                                        |                                       | <i>Petromyzon marinus</i> (Sea Lamprey)                        | -            | -          | -          | ?            | -         |
| Cartilaginous Fish<br>(Chondrichthyes) |                                       | <i>Callorhynchus mili</i> (Elephant Shark)                     | -            | -          | -          | +            | -         |
|                                        |                                       | <i>Chiloscyllium punctatum</i> (Brownbanded bamboo shark)      | -            | -          | -          | +            | -         |
|                                        |                                       | <i>Discopyge ommata</i> (Ocellated electric Ray)               | -            | -          | -          | +            | -         |
|                                        |                                       | <i>Rhincodon typus</i> (Whale Shark)                           | -            | -          | -          | +            | -         |
|                                        |                                       | <i>Scyliorhinus canicula</i> (Small-Spotted Catshark)          | -            | -          | -          | +            | -         |
| Ray-Finned Fish<br>(Actinopterygii)    |                                       | <i>Acanthochromis polyacanthus</i> (Spiny Chromis Damsel fish) | -            | -          | -          | +            | -         |
|                                        |                                       | <i>Amphiprion ocellaris</i> (Ocellaris Clownfish)              | -            | -          | -          | +            | -         |
|                                        |                                       | <i>Anabas testudineus</i> (Climbing Perch)                     | -            | -          | -          | +            | -         |
|                                        |                                       | <i>Archocentrus centrarchus</i> (a Cichlid)                    | -            | -          | -          | +            | -         |
|                                        |                                       | <i>Astatotilapia calliptera</i> (Eastern Happy)                | -            | -          | -          | +            | -         |
|                                        |                                       | <i>Astyanax mexicanus</i> (Mexican tetra)                      | -            | -          | -          | +            | -         |
|                                        |                                       | <i>Austrofundulus limnaeus</i> (a Killifish)                   | -            | -          | -          | +            | -         |
|                                        |                                       | <i>Betta splendens</i> (Siamese Fighting Fish)                 | -            | -          | -          | +            | -         |
|                                        |                                       | <i>Boleophthalmus pectinirostris</i> (Mudskipper)              | -            | -          | -          | +            | -         |
|                                        |                                       | <i>Carassius auratus</i> (Goldfish)                            | -            | -          | -          | +            | -         |
|                                        |                                       | <i>Chanos chanos</i> (Milkfish)                                | -            | -          | -          | +            | -         |
|                                        |                                       | <i>Clupea harengus</i> (Atlantic Herring)                      | -            | -          | -          | +            | -         |
|                                        |                                       | <i>Cynoglossus semilaevis</i>                                  | -            | -          | -          | +            | -         |
|                                        |                                       | <i>Cyprinodon variegatus</i> (Sheepshead Minnow)               | -            | -          | -          | +            | -         |
|                                        |                                       | <i>Danio rerio</i> (Zebrafish)                                 | -            | -          | -          | +            | -         |
|                                        |                                       | <i>Denticeps clupeoides</i> (Denticle Herring)                 | -            | -          | -          | +            | -         |
|                                        |                                       | <i>Echeneis naucrates</i> (Live Sharksucker)                   | -            | -          | -          | +            | -         |
|                                        |                                       | <i>Electrophorus electricus</i> (Electric Eel)                 | -            | -          | -          | +            | -         |
|                                        |                                       | <i>Erpetoichthys calabaricus</i> (Reedfish)                    | -            | -          | -          | +            | -         |
|                                        |                                       | <i>Fundulus heteroclitus</i> (Mummichog)                       | -            | -          | -          | +            | -         |
|                                        |                                       | <i>Fugu rubripes</i> (Pufferfish)                              | -            | -          | -          | +            | -         |
|                                        |                                       | <i>Gadus morhua</i> (Atlantic Cod)                             | -            | -          | -          | +            | -         |
|                                        |                                       | <i>Gouania willdenowi</i> (Blunt-Snouted Clingfish)            | -            | -          | -          | +            | -         |
|                                        |                                       | <i>Haplochromis burtoni</i> (Burton's Mouthbrooder)            | -            | -          | -          | +            | -         |
|                                        |                                       | <i>Hippocampus comes</i> (Tiger Tail Seahorse)                 | -            | -          | -          | +            | -         |
|                                        |                                       | <i>Ictalurus punctatus</i> (Channel Catfish)                   | -            | -          | -          | +            | -         |
|                                        |                                       | <i>Kryptolebias marmoratus</i> (Mangrove Killifish)            | -            | -          | -          | +            | -         |
|                                        |                                       | <i>Labrus bergylta</i> (Ballan Wrasse)                         | -            | -          | -          | +            | -         |
|                                        |                                       | <i>Larimichthys crocea</i> (Large Yellow Croaker)              | -            | -          | -          | +            | -         |
|                                        |                                       | <i>Lates calcarifer</i> (Asian Sea Bass)                       | -            | -          | -          | +            | -         |
|                                        |                                       | <i>Mastacembelus armatus</i> (Zig-Zag Eel)                     | -            | -          | -          | +            | -         |
|                                        |                                       | <i>Maylandia zebra</i> (Zebra Mbuna Cichlid)                   | -            | -          | -          | +            | -         |
|                                        |                                       | <i>Monopterus albus</i> (Asian Swamp Eel)                      | -            | -          | -          | +            | -         |
|                                        |                                       | <i>Myripristis murdjan</i> (Pinecone Soldierfish)              | -            | -          | -          | +            | -         |
|                                        |                                       | <i>Neolamprologus brichardi</i> (Fairy Cichlid)                | -            | -          | -          | +            | -         |
|                                        |                                       | <i>Nothobranchius furzeri</i> (Turquoise Killifish)            | -            | -          | -          | +            | -         |
|                                        |                                       | <i>Oncorhynchus mykiss</i> (Rainbow Trout)                     | -            | -          | -          | +            | -         |
|                                        |                                       | <i>Oncorhynchus tshawytscha</i> (Chinook Salmon)               | -            | -          | -          | +            | -         |
|                                        |                                       | <i>Oreochromis aureus</i> (Blue Tilapia) <i>Oreochromis</i>    | -            | -          | -          | +            | -         |
|                                        |                                       | <i>niloticus</i> (Nile Tilapia)                                | -            | -          | -          | +            | -         |
|                                        |                                       | <i>Oryzias melastigma</i> (a Ricefish)                         | -            | -          | -          | +            | -         |
|                                        |                                       | <i>Pangasianodon hypophthalmus</i> (Iridescent Shark)          | -            | -          | -          | +            | -         |
|                                        |                                       | <i>Paralichthys olivaceus</i> (Olive Flounder)                 | -            | -          | -          | +            | -         |
|                                        |                                       | <i>Parambassis ranga</i> (Indian Glassy Perch)                 | -            | -          | -          | +            | -         |
|                                        |                                       | <i>Paramormyrops kingsleyae</i> (Old Calabar Mormyrid)         | -            | -          | -          | +            | -         |
|                                        |                                       | <i>Perca flavescens</i> (Yellow Perch)                         | -            | -          | -          | +            | -         |
|                                        |                                       | <i>Poecilia formosa</i> (Amazon Molly)                         | -            | -          | -          | +            | -         |
|                                        |                                       | <i>Poecilia latipinna</i> (Sailfin Molly)                      | -            | -          | -          | +            | -         |
|                                        |                                       | <i>Poecilia mexicana</i> (Shortfin Molly)                      | -            | -          | -          | +            | -         |
|                                        |                                       | <i>Poecilia reticulata</i> (Guppy)                             | -            | -          | -          | +            | -         |
|                                        | <i>Pundamilia nyerere</i> (a Cichlid) | -                                                              | -            | -          | +          | -            |           |

| Group                            | Subdivision                                       | Species (Common Name)                                         | Klkb1                                             | F11 | F12 | HGFAC | HK |
|----------------------------------|---------------------------------------------------|---------------------------------------------------------------|---------------------------------------------------|-----|-----|-------|----|
| Ray-Finned Fish                  |                                                   | <i>Salmo salar</i> (Atlantic salmon)                          | -                                                 | -   | -   | +     | -  |
|                                  |                                                   | <i>Salmo trutta</i> (Brown trout)                             | -                                                 | -   | -   | +     | -  |
|                                  |                                                   | <i>Salvelinus alpinus</i> (Arctic Char)                       | -                                                 | -   | -   | +     | -  |
|                                  |                                                   | <i>Sander lucioperca</i> (Zander)                             | -                                                 | -   | -   | +     | -  |
|                                  |                                                   | <i>Scleropages formosus</i> (Asian Arowana)                   | -                                                 | -   | -   | +     | -  |
|                                  |                                                   | <i>Seriola dumerili</i> (Greater Amberjack)                   | -                                                 | -   | -   | +     | -  |
|                                  |                                                   | <i>Seriola lalandi dorsalis</i> (California Yellowtail)       | -                                                 | -   | -   | +     | -  |
|                                  |                                                   | <i>Sinocyclocheilus anshuiensis</i> (a Cavefish)              | -                                                 | -   | -   | +     | -  |
|                                  |                                                   | <i>Sinocyclocheilus grahami</i> (Golden-Line Barbel)          | -                                                 | -   | -   | +     | -  |
|                                  |                                                   | <i>Sinocyclocheilus rhinoceros</i> (a Cavefish)               | -                                                 | -   | -   | +     | -  |
|                                  |                                                   | <i>Sparus aurata</i> (Gilt-Head Bream)                        | -                                                 | -   | -   | +     | -  |
|                                  |                                                   | <i>Sphaeramia orbicularis</i> (Orbiculate Cardinalfish)       | -                                                 | -   | -   | +     | -  |
|                                  |                                                   | <i>Stegastes partitus</i> (Dicolor Damselfish)                | -                                                 | -   | -   | +     | -  |
|                                  |                                                   | <i>Tachysurus fulvidraco</i> (Yellowhead Catfish)             | -                                                 | -   | -   | +     | -  |
|                                  |                                                   | <i>Xiphophorus couchianus</i> (Monterrey Platyfish)           | -                                                 | -   | -   | +     | -  |
|                                  | <i>Xiphophorus maculatus</i> (Southern Platyfish) | -                                                             | -                                                 | -   | +   | -     |    |
| Lobe-finned Fish (Sarcopterygii) |                                                   | <i>Latimeria chalumnae</i> (West Indian Ocean Coelacanth)     | +                                                 | -   | -   | +     | +  |
|                                  |                                                   | <i>Protopterus annectens</i> (West African Lungsish)          | +                                                 | -   | +   | +     | +  |
| Amphibians                       |                                                   | <i>Microcaecilia unicolor</i> (a Caecilian)                   | +                                                 | -   | +   | +     | +  |
|                                  |                                                   | <i>Nanorana parkeri</i> (High Himalya Frog)                   | +                                                 | -   | +   | +     | +  |
|                                  |                                                   | <i>Rhinatrema bivittatum</i> (Two-lined Caecilians)           | +                                                 | -   | +   | +     | +  |
|                                  |                                                   | <i>Xenopus laevis</i> (African Clawed Frog)                   | +                                                 | -   | +   | +     | +  |
|                                  |                                                   | <i>Xenopus tropicalis</i> (Western Clawed Frog)               | +                                                 | -   | +   | +     | +  |
| Reptiles                         | Turtles                                           | <i>Chrysemys picta bellii</i> (Box Turtle)                    | +                                                 | -   | +   | +     | +  |
|                                  |                                                   | <i>Chelonia mydas</i> (Green Sea Turtle)                      | +                                                 | -   | +   | +     | +  |
|                                  |                                                   | <i>Gopherus evgoodei</i> (Gopher Tortoise)                    | +                                                 | -   | +   | +     | +  |
|                                  |                                                   | <i>Pelodiscus sinensis</i> (Chinese Softshell Turtle)         | +                                                 | -   | +   | +     | +  |
|                                  |                                                   | <i>Terrapene carolina triunguis</i> (Three-Toed Box Turtle)   | +                                                 | -   | +   | +     | +  |
|                                  | Lizards                                           | <i>Paroedura picta</i> (Ocelot Gecko)                         | +                                                 | -   | +   | +     | +  |
|                                  |                                                   | <i>Anolis carolinensis</i> (Green Anole)                      | +                                                 | -   | +   | +     | +  |
|                                  |                                                   | <i>Gekko japonicus</i> (Schlegel's Japanese Gecko)            | +                                                 | -   | +   | +     | ?  |
|                                  |                                                   | <i>Podarcis muralis</i> (Common Wall Lizard)                  | +                                                 | -   | +   | +     | +  |
|                                  |                                                   | <i>Pogona vitticeps</i> (Central Bearded Dragon)              | +                                                 | -   | +   | +     | +  |
|                                  | Snakes                                            | <i>Daboia russelii</i> (Russell's Viper)                      | +                                                 | -   | +   | +     | +  |
|                                  |                                                   | <i>Notechis scutatus</i> (Tiger Snake)                        | +                                                 | -   | +   | +     | +  |
|                                  |                                                   | <i>Protobothrops mucrosquamatus</i> (Brown-Spotted Pit Viper) | +                                                 | -   | +   | +     | +  |
|                                  |                                                   | <i>Pseudonaja textilis</i> (Eastern Brown Snake)              | +                                                 | -   | +   | +     | +  |
|                                  |                                                   | <i>Python bivittatus</i> (Burmese Python)                     | +                                                 | -   | +   | +     | +  |
|                                  |                                                   | <i>Thamnophis sirtalis</i> (Common Garter Snake)              | +                                                 | -   | +   | +     | +  |
|                                  | Crocodylans                                       | <i>Alligator mississippiensis</i> (American Alligator)        | +                                                 | -   | +   | +     | +  |
|                                  |                                                   | <i>Crocodylus porosus</i> (Saltwater Crocodile)               | +                                                 | -   | +   | +     | +  |
|                                  |                                                   | <i>Gavialis gangeticus</i> (Gharial)                          | +                                                 | -   | +   | +     | ?  |
|                                  | Birds                                             |                                                               | <i>Amazona aestiva</i> (Turquoise-Fronted Amazon) | +   | -   | -     | +  |
|                                  |                                                   | <i>Anas platyrhynchos</i> (Mallard)                           | +                                                 | -   | -   | +     | +  |
|                                  |                                                   | <i>Anser cygnoides domesticus</i> (Domestic Goose)            | +                                                 | -   | -   | +     | +  |
|                                  |                                                   | <i>Antrostomus carolinensis</i> (Chuck-Will's-Widow)          | +                                                 | -   | -   | +     | +  |
|                                  |                                                   | <i>Apaloderma vittatum</i> (Bar-Tailed Trogon)                | +                                                 | -   | -   | +     | +  |
|                                  |                                                   | <i>Aptenodytes forsteri</i> (Emperor Penguin)                 | +                                                 | -   | -   | +     | +  |
|                                  |                                                   | <i>Apteryx australis mantelli</i> (North Island Brown Kiwi)   | +                                                 | -   | -   | +     | +  |
|                                  |                                                   | <i>Apteryx rowi</i> (Okarito Kiwi)                            | +                                                 | -   | -   | +     | +  |
|                                  |                                                   | <i>Aquila chrysaetos canadensis</i> (Golden Eagle)            | +                                                 | -   | -   | +     | +  |
|                                  |                                                   | <i>Buceros rhinoceros silvestris</i> (Rhinoceros Hornbill)    | +                                                 | -   | -   | +     | +  |
|                                  |                                                   | <i>Calidris pugnax</i> (Ruff)                                 | +                                                 | -   | -   | +     | +  |
|                                  |                                                   | <i>Calypte anna</i> (Anna's Hummingbird)                      | +                                                 | -   | -   | +     | +  |
|                                  |                                                   | <i>Cariama cristata</i> (Red-legged Seriema)                  | +                                                 | -   | -   | +     | +  |
|                                  |                                                   | <i>Cathartes aura</i> (Turkey Vulture)                        | +                                                 | -   | -   | +     | +  |
|                                  |                                                   | <i>Chaetura pelagica</i> (Chimney Swift)                      | +                                                 | -   | -   | +     | +  |
|                                  |                                                   | <i>Charadrius vociferous</i> (Killdeer)                       | +                                                 | -   | -   | +     | +  |

| Group | Subdivision | Species (Common Name)                                                                         | Klkb1 | F11 | F12 | HGFAC | HK |
|-------|-------------|-----------------------------------------------------------------------------------------------|-------|-----|-----|-------|----|
| Birds |             | <i>Columba livia</i> (Rock Dove)                                                              | +     | -   | -   | +     | +  |
|       |             | <i>Corapipo altera</i> (White-Ruffed Manakin)                                                 | +     | -   | -   | +     | +  |
|       |             | <i>Corvus brachyrhynchos</i> (American Crow)                                                  | +     | -   | -   | +     | +  |
|       |             | <i>Coturnix japonica</i> (Japanese Quail)                                                     | +     | -   | -   | +     | +  |
|       |             | <i>Cuculus canorus</i> (Common Cuckoo)                                                        | +     | -   | -   | +     | +  |
|       |             | <i>Dromaius novaehollandiae</i> (Emu)                                                         | +     | -   | -   | +     | +  |
|       |             | <i>Egretta garzetta</i> (Little Egret)                                                        | +     | -   | -   | +     | +  |
|       |             | <i>Empidonax traillii</i> (Willow Flycatcher)                                                 | +     | -   | -   | +     | +  |
|       |             | <i>Erythrura gouldiae</i> (Gouldian Finch)                                                    | +     | -   | -   | +     | +  |
|       |             | <i>Eurypyga helias</i> (Sunbittern)                                                           | +     | -   | -   | +     | +  |
|       |             | <i>Falco cherrug</i> (Saker Falcon)                                                           | +     | -   | -   | +     | +  |
|       |             | <i>Falco peregrinus</i> (Peregrine Falcon)                                                    | +     | -   | -   | +     | +  |
|       |             | <i>Ficedula albicollis</i> (Collared Flycatcher)                                              | +     | -   | -   | +     | +  |
|       |             | <i>Gavia stellata</i> (Red-Throated Loon)                                                     | +     | -   | -   | +     | +  |
|       |             | <i>Gallus gallus domesticus</i> (Chicken)                                                     | +     | -   | -   | +     | +  |
|       |             | <i>Geospiza fortis</i> (Medium Ground Finch)                                                  | +     | -   | -   | +     | +  |
|       |             | <i>Haliaeetus albicilla</i> (White-Tailed eagle)                                              | +     | -   | -   | +     | +  |
|       |             | <i>Haliaeetus leucocephalus</i> (Bald Eagle)                                                  | +     | -   | -   | +     | +  |
|       |             | <i>Lepidothrix coronata</i> (Blue-Crowned Manakin)                                            | +     | -   | -   | +     | +  |
|       |             | <i>Leptosomus discolor</i> (Cuckoo Roller)                                                    | +     | -   | -   | +     | +  |
|       |             | <i>Limosa lapponica baueri</i> (Bar-Tailed Godwit)                                            | +     | -   | -   | +     | +  |
|       |             | <i>Lonchura striata domestica</i> (Society Finch)                                             | +     | -   | -   | +     | +  |
|       |             | <i>Manacus vitellinus</i> (Golden-Collared Manakin)                                           | +     | -   | -   | +     | +  |
|       |             | <i>Meleagris gallopavo</i> (Wild Turkey)                                                      | +     | -   | -   | +     | +  |
|       |             | <i>Merops nubicus</i> (Northern Carmine Bee-Eater)                                            | +     | -   | -   | +     | +  |
|       |             | <i>Neopelma chrysocephalum</i> (Saffron-Crested Tyrant-Manakin)                               | +     | -   | -   | +     | +  |
|       |             | <i>Nestor notabilis</i> (Kea)                                                                 | +     | -   | -   | +     | +  |
|       |             | <i>Nipponia nippon</i> (Crested Ibis)                                                         | +     | -   | -   | +     | +  |
|       |             | <i>Nothoprocta perdicaria</i> (Chilean Tinamou)                                               | +     | -   | -   | +     | +  |
|       |             | <i>Numida Meleagris</i> (Helmeted Guineafowl)                                                 | +     | -   | -   | +     | +  |
|       |             | <i>Opisthocomus hoazin</i> (Hoatzin)                                                          | +     | -   | -   | +     | +  |
|       |             | <i>Pelecanus crispus</i> (Dalmatian Pelican)                                                  | +     | -   | -   | +     | +  |
|       |             | <i>Parus major</i> (Great Tit)                                                                | +     | -   | -   | +     | +  |
|       |             | <i>Patagioenas fasciata monilis</i> (Band-Tailed Pegeon)                                      | +     | -   | -   | +     | +  |
|       |             | <i>Picoides pubescens</i> (Downy Woodpecker)                                                  | +     | -   | -   | +     | +  |
|       |             | <i>Pipra filicauda</i> (Wire-Tailed Manakin)                                                  | +     | -   | -   | +     | +  |
|       |             | <i>Phalacrocorax carbo</i> (Great Cormorant)                                                  | +     | -   | -   | +     | +  |
|       |             | <i>Phaethon lepturos</i> (White-Tailed Tropicbird)                                            | +     | -   | -   | +     | +  |
|       |             | <i>Podiceps cristatus</i> (Great Crested Grebe)                                               | +     | -   | -   | +     | +  |
|       |             | <i>Pseudopodoces humilis</i> (Ground Tit)                                                     | +     | -   | -   | +     | +  |
|       |             | <i>Pterocles gutturalis</i> (Yellow-Throated Sandgrouse)                                      | +     | -   | -   | +     | +  |
|       |             | <i>Pygoscelis adeliae</i> (Adélie Penguin)                                                    | +     | -   | -   | +     | +  |
|       |             | <i>Serinus canaria</i> (Atlantic Canary)                                                      | +     | -   | -   | +     | +  |
|       |             | <i>Sturnus vulgaris</i> (Common Starling)                                                     | +     | -   | -   | +     | +  |
|       |             | <i>Struthio camelus australis</i> (Southern Ostrich) <i>Taeniopygia guttata</i> (Zebra Finch) | +     | -   | -   | +     | +  |
|       |             | <i>Tauraco erythrolophus</i> (Red-Crested Turaco)                                             | +     | -   | -   | +     | +  |
|       |             | <i>Tinamus guttatus</i> (White-Throated Tinamou)                                              | +     | -   | -   | +     | +  |
|       |             | <i>Tyto alba</i> (Barn Owl)                                                                   | +     | -   | -   | +     | +  |
|       |             | <i>Zonotrichia albicollis</i> (White-Throated Sparrow)                                        | +     | -   | -   | +     | +  |

| Group   | Subdivision                                         | Species (Common Name)                                              | Klkb1 | F11 | F12 | HGFAC | HK |
|---------|-----------------------------------------------------|--------------------------------------------------------------------|-------|-----|-----|-------|----|
| Mammals | Monotremes                                          | <i>Ornithorhynchus anatinus</i> (Duck-Billed Platypus)             | +     | +   | +   | +     | +  |
|         |                                                     | <i>Tachyglossus aculeatus</i> (Short-Beaked Echidna)               | ND    | +   | ND  | ND    | ND |
|         |                                                     |                                                                    |       |     |     |       |    |
|         | Marsupials                                          | <i>Monodelphis domestica</i> (Gray Short-Tailed Opossum)           | +     | +   | +   | +     | +  |
|         |                                                     | <i>Phascolarctos cinereus</i> (Koala)                              | +     | +   | +   | +     | +  |
|         |                                                     | <i>Sarcophilus harrisi</i> (Tasmanian Devil)                       | +     | +   | +   | +     | +  |
|         |                                                     | <i>Vombatus ursinus</i> (Common Wombat)                            | +     | +   | +   | +     | +  |
|         | Placental<br>(Eutherian)<br>Terrestrial             | <i>Acinonyx jubatus</i> (Cheetah)                                  | +     | +   | +   | +     | +  |
|         |                                                     | <i>Ailuropoda melanoleuca</i> (Giant Panda)                        | +     | +   | +   | +     | +  |
|         |                                                     | <i>Bos mutus</i> (Domestic Yak)                                    | +     | +   | +   | +     | +  |
|         |                                                     | <i>Bos tarus</i> (Domestic Cattle)                                 | +     | +   | +   | +     | +  |
|         |                                                     | <i>Callorhinus ursinus</i> (Northern Fur Seal)                     | +     | +   | +   | +     | +  |
|         |                                                     | <i>Camelus bactrianus</i> (Bactrian Camel)                         | +     | +   | +   | +     | +  |
|         |                                                     | <i>Camelus dromedaries</i> (Dromedary)                             | +     | +   | +   | +     | +  |
|         |                                                     | <i>Camelus ferus</i> (Wild Bactrian Camel)                         | +     | +   | +   | +     | +  |
|         |                                                     | <i>Canis lupus familiaris</i> (Dog)                                | +     | +   | +   | +     | +  |
|         |                                                     | <i>Castor canadensis</i> (American Beaver)                         | +     | +   | +   | +     | +  |
|         |                                                     | <i>Cavia porcellus</i> (Guinea Pig)                                | +     | +   | +   | +     | +  |
|         |                                                     | <i>Ceratotherium simum simum</i> (Southern White Rhinoceros)       | +     | +   | +   | +     | +  |
|         |                                                     | <i>Chinchilla lanigera</i> (Long-Tailed Chinchilla)                | +     | +   | +   | +     | +  |
|         |                                                     | <i>Chrysochloris asiatica</i> (Cape Golden Mole)                   | +     | +   | +   | +     | +  |
|         |                                                     | <i>Condylura cristata</i> (Star-Nosed Mole)                        | +     | +   | +   | +     | +  |
|         |                                                     | <i>Cricetulus griseus</i> (Chinese Hamster)                        | +     | +   | +   | +     | +  |
|         |                                                     | <i>Dipodomys ordii</i> (Ord's Kangaroo Rat)                        | +     | +   | +   | +     | +  |
|         |                                                     | <i>Enhydra lutris kenyoni</i> (Sea Otter)                          | +     | +   | +   | +     | +  |
|         |                                                     | <i>Equus asinus</i> (Donkey)                                       | +     | +   | +   | +     | +  |
|         |                                                     | <i>Equus caballus</i> (Horse)                                      | +     | +   | +   | +     | +  |
|         |                                                     | <i>Equus przewalskii</i> (Przewalski's Horse)                      | +     | +   | +   | +     | +  |
|         |                                                     | <i>Erinaceus europaeus</i> (European Hedgehog)                     | +     | +   | +   | +     | +  |
|         |                                                     | <i>Eumetopias jubatus</i> (Stellar Sea Lion)                       | +     | +   | +   | +     | +  |
|         |                                                     | <i>Felis catus</i> (Cat)                                           | +     | +   | +   | +     | +  |
|         |                                                     | <i>Fukomys damarensis</i> (Damara Mole-Rat)                        | +     | +   | +   | +     | +  |
|         |                                                     | <i>Heterocephalus glaber</i> (Naked Mole Rat)                      | +     | +   | +   | +     | +  |
|         |                                                     | <i>Hippopotamus amphibious</i> (Hippopotamus)                      | +     | +   | +   | +     | +  |
|         |                                                     | <i>Homo sapiens</i> (Human)                                        | +     | +   | +   | +     | +  |
|         |                                                     | <i>Ictidomys tridecemlineatus</i> (Thirteen-Lined Ground Squirrel) | +     | +   | +   | +     | +  |
|         |                                                     | <i>Jaculus jaculus</i> (Lesser Egyptian Jerboa)                    | +     | +   | +   | +     | +  |
|         |                                                     | <i>Leptonychotes weddellii</i> (Weddell Seal)                      | +     | +   | +   | +     | +  |
|         |                                                     | <i>Loxodonta Africana</i> (African Elephant)                       | +     | +   | +   | +     | +  |
|         |                                                     | <i>Lynx canadensis</i> (Canada Lynx)                               | +     | +   | +   | +     | +  |
|         |                                                     | <i>Manis javanica</i> (Sunda Pangolin)                             | +     | +   | +   | +     | +  |
|         |                                                     | <i>Marmota flaviventris</i> (Yellow-Bellied Marmot)                | +     | +   | +   | +     | +  |
|         |                                                     | <i>Marmota marmota marmota</i> (Alpine Marmot)                     | +     | +   | +   | +     | +  |
|         |                                                     | <i>Marmota monax</i> (Groundhog)                                   | +     | +   | +   | +     | +  |
|         |                                                     | <i>Mesocricetus auratus</i> (Golden Hamster)                       | +     | +   | +   | +     | +  |
|         |                                                     | <i>Mustela putorius furo</i> (Ferret)                              | +     | +   | +   | +     | +  |
|         |                                                     | <i>Nannospalax galili</i> (Spalax)                                 | +     | +   | +   | +     | +  |
|         |                                                     | <i>Neomonachus schauinslandi</i> (Hawaiian Monk Seal)              | +     | +   | +   | +     | +  |
|         |                                                     | <i>Octodon degus</i> (Common Degu)                                 | +     | +   | +   | +     | +  |
|         |                                                     | <i>Odobenus rosmarus divergens</i> (Pacific Walrus)                | +     | +   | +   | +     | +  |
|         |                                                     | <i>Odocoileus virginianus texanus</i> (White-Tailed Deer)          | +     | +   | +   | +     | +  |
|         |                                                     | <i>Orycteropus afer afer</i> (Aardvark)                            | +     | +   | +   | +     | +  |
|         |                                                     | <i>Oryctolagus cuniculus</i> (European Rabbit)                     | +     | +   | +   | +     | +  |
|         |                                                     | <i>Panthera pardus</i> (Leopard)                                   | +     | +   | +   | +     | +  |
|         | <i>Panthera tigris altaica</i> (Siberian Tiger)     | +                                                                  | +     | +   | +   | +     |    |
|         | <i>Peromyscus leucopus</i> (White-Footed Mouse)     | +                                                                  | +     | +   | +   | +     |    |
|         | <i>Peromyscus maniculatus bairdii</i> (Deer Mouse)  | +                                                                  | +     | +   | +   | +     |    |
|         | <i>Puma concolor</i> (Cougar)                       | +                                                                  | +     | +   | +   | +     |    |
|         | <i>Sorex araneus</i> (Common Shrew)                 | +                                                                  | +     | +   | +   | +     |    |
|         | <i>Suricata suricatta</i> (Meerkat)                 | +                                                                  | +     | +   | +   | +     |    |
|         | <i>Sus scrofa</i> (Wild Boar)                       | +                                                                  | +     | +   | +   | +     |    |
|         | <i>Tupaia chinensis</i> (Northern Tree Shrew)       | +                                                                  | +     | +   | +   | +     |    |
|         | <i>Urocitellus parryii</i> (Arctic Ground Squirrel) | +                                                                  | +     | +   | +   | +     |    |
|         | <i>Ursus arctos horribilis</i> (Grizzly Bear)       | +                                                                  | +     | +   | +   | +     |    |

| Group                                                    | Subdivision                              | Species (Common Name)                                           | <i>Klkb1</i> | <i>F11</i> | <i>F12</i> | <i>HGFAC</i> | <i>HK</i> |
|----------------------------------------------------------|------------------------------------------|-----------------------------------------------------------------|--------------|------------|------------|--------------|-----------|
| Mammals                                                  | Placentals<br>(Eutherian)<br>Terrestrial | <i>Ursus maritimus</i> (Polar Bear)                             | +            | +          | +          | +            | +         |
|                                                          |                                          | <i>Vulpes Vulpes</i> (Red Fox)                                  | +            | +          | +          | +            | +         |
|                                                          |                                          | <i>Zalophus californianus</i> (California Sea Lion)             | +            | +          | +          | +            | +         |
|                                                          |                                          |                                                                 |              |            |            |              |           |
|                                                          | Placentals<br>(Eutherian)<br>Cetacean    | <i>Balaenoptera acutorostrata scammoni</i> (Minke Whale)        | -            | +          | -          | +            | +         |
|                                                          |                                          | <i>Balaenoptera physalus</i> (Fin Whale)                        | -            | +          | -          | +            | +         |
|                                                          |                                          | <i>Delphinapterus leucas</i> (Beluga Whale)                     | -            | +          | -          | +            | +         |
|                                                          |                                          | <i>Globicephala melas</i> (Long-Finned Pilot Whale)             | -            | +          | -          | +            | +         |
|                                                          |                                          | <i>Lagenorhynchus obliquidens</i> (Pacific White-Sided Dolphin) | -            | +          | -          | +            | +         |
|                                                          |                                          | <i>Lipotes vexillifer</i> (Baiji)                               | -            | +          | -          | +            | +         |
|                                                          |                                          | <i>Neophocaena asiaeorientalis</i> (Finless Porpoise)           | -            | +          | -          | +            | +         |
|                                                          |                                          | <i>Monodon Monoceros</i> (Narwhal)                              | -            | +          | -          | +            | +         |
|                                                          |                                          | <i>Orcinus orca</i> (Killer Whale)                              | -            | +          | -          | +            | +         |
|                                                          |                                          | <i>Physeter catodon</i> (Sperm Whale)                           | -            | +          | -          | +            | +         |
| <i>Sousa chinensis</i> (Indo-Pacific Humpbacked Dolphin) |                                          | -                                                               | +            | -          | +          | +            |           |
| <i>Tursiops truncatus</i> (Common Bottlenose Dolphin)    | -                                        | +                                                               | -            | +          | +          |              |           |

ND – Not Done

? – Sequences may be present, but there is uncertainty.

Data bases analyzed in the current study included nucleotide collections, non-redundant protein sequences, whole-genome shotgun contigs (WGS) and the Sequence Read Archives (SRA) of DNA and RNA stored in the National Center for Biotechnology Information (NCBI). The Ensembl Genome Browser of the European Bioinformatics Institute (EMBL-EBI) was used for additional searches, localization of homologous genes, sequence verification, and for gene structure and synteny studies in available genomes. Basic Local Alignment Search Tool (BLAST) was used to conduct the surveys for prekallikrein (*KIKb1*), factor XII (*F12*), high-molecular-weight kininogen (*KnG1*), factor XI (*F11*) and pro-hepatocyte growth factor activator (*HGFAC*) orthologs and paralogs for the species under study in the listed data resources. Predicted protein sequences based on nucleotide collections were downloaded from NCBI BLAST results in FASTA format. Reconstructions for protein sequences for some species not present in these collections (listed below) were based on SRA sequences and manual assembly, assisted by BLAST and using multiple amino acid sequence alignments. Additional multiple sequence alignments and phylogenetic relations were made and analyzed with CLUSTAL. In some cases, additional multiple sequence alignments were made manually and checked by identifying conserved cysteine residues and other conserved amino acids.

SRA data sets were analyzed for the following organisms (SRA ID are provided for each species):

*Protopterus annectens* (West African Lungfish) SRX1016235, SRX1016236; *Protopterus sp.*, ERX2256863, ERX2256864

*Latimeria chalumnae* (West Indian Ocean Coelacanth) DRX001703, DRX001704, DRX002994, SRX110147, SRX110150, SRX112771

*Hippopotamus amphibius* (Hippopotamus) SRX1164570, SRX2880553, SRX2899275, SRX2899276, SRX2899277, SRX2899278, SRX2899279

*Tachyglossus aculeatus* (Short-Beaked Echidna) SRX317056, SRX317058, SRX7214460, SRX7214453

## Supplemental Figure 2. Recombinant Factor XI

**Factor XI A3 Domain variants.** Nucleic acid sequence encoding the A3 domain (amino acids 179 through 269 in the cDNA for human wild type fXI (FXI-WT) were replaced by the corresponding sequence from the human PK-A3 to generate a cDNA for the chimera fXI/PKA3, from platypus fXI-A3 to generate fXI/*Plat*FXIA3 cDNA, and from platypus PK-A3 to generate fXI/*Plat*PKA3 cDNA. In the schematic diagram of fXI below, A1 to A4 represent the four apple domains and the light gray box the catalytic protease domain. Arg369 is the activation cleavage site and Ser557 the active site serine residue. S\* indicates the position of Cys321, which forms the interchain disulfide bond in the FXI dimer.

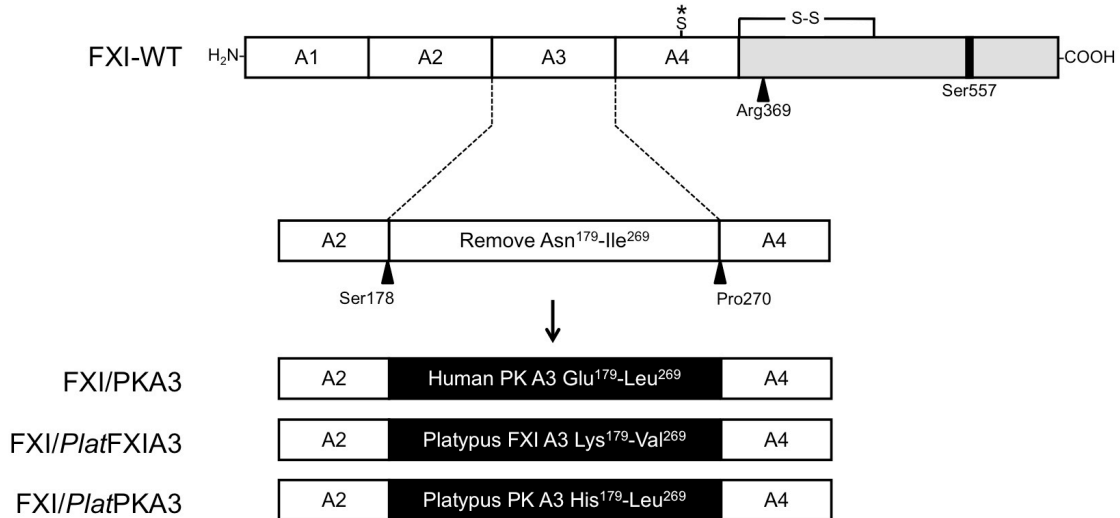

**FXI with platypus activation cleavage site.** Nucleic acid sequence encoding Lys367 and Pro368 in human fXI-WT were replaced with sequence encoding Arg367 and Ser368 from the platypus fXI sequence to form a cDNA for fXI-*Plat*RSR.

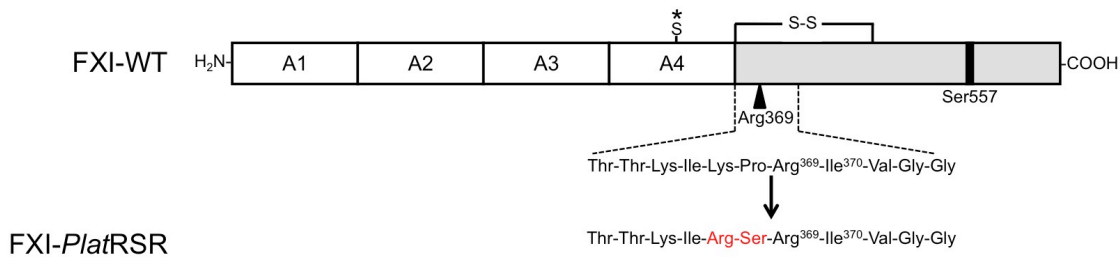

**Recombinant FXI and FXIa.** *Left Panel – FXI.* FXI variants described above were expressed in HEK293 cells and purified from conditioned media by monoclonal IgG chromatography. Samples (2 μg) were run on 7.5% polyacrylamide-SDS gels under non-reducing conditions and stained with Coomassie Blue. *Right Panel – FXIa.* Proteins shown in the left panel were incubated with fXIIa to generate the heavy chain (HC) and light chain (LC) of fXIa. Samples (2 μg) were run on 7.5% polyacrylamide-SDS gels under reducing conditions and stained with Coomassie Blue. The heavy chain of fXIa/*Plat*FXIA3 sustained an additional cleavage, dividing it between the A2 and A3 domains. This did not appear to impact activity in aPTT or factor IX activation assays. For both panels, positions of molecular mass markers are on the left.

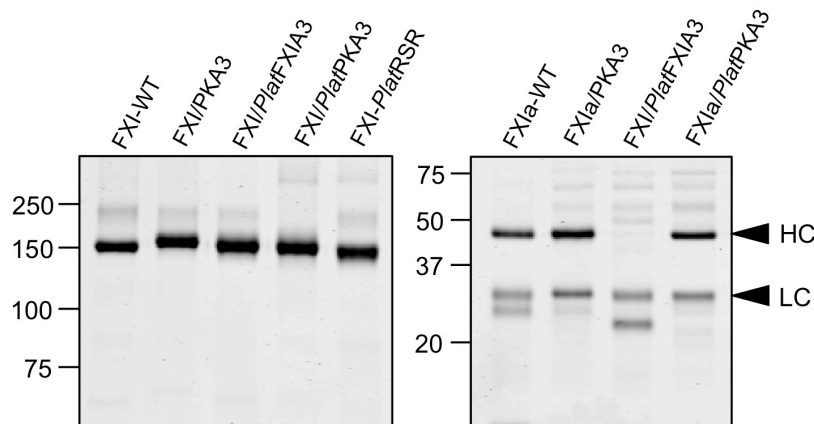

**Supplemental Figure 3. Recombinant FXII and Pro-HGFA.** The schematics show the domain organization for Pro-hepatocyte growth factor activator (Pro-HGFA) and its paralog factor XII (FXII). The non-catalytic heavy chains of both proteins contain fibronectin type II (F2), epidermal growth factor (EGF1 and EGF2), fibronectin type I (F1) and kringle (K) domains. FXII also has a proline-rich region (PRR). The catalytic domains are shown in grey. Arg407 and Arg353 are the activation cleavage sites, and Ser598 and Ser544 the active site serines. The cDNAs for human Pro-HGFA and fXII were modified to include sequence for an eight amino acid hemagglutinin tag at the C-termini (indicated in red). The cDNAs were expressed in HEK293 cells and purified by anti-HA IgG affinity chromatography.

FXII was converted to fXIIa by incubation with dextran sulfate. Pro-HGFA was converted to the active protease HGFA by incubation with dextran sulfate and thrombin. Reactions were stopped by addition of polybrene to dissociate the proteins from the dextran sulfate and hirudin to neutralize thrombin. The proteins were repurified by anti-HA IgG affinity chromatography. Samples (2  $\mu$ g) of the unactivated and activated proteins were run on 10% polyacrylamide-SDS gels under reducing conditions and stained with Coomassie Blue. The heavy chains (HC) and light chains (LC) of the activated forms are indicated at the right of each panel. Molecular mass markers are indicated at the left of each panel.

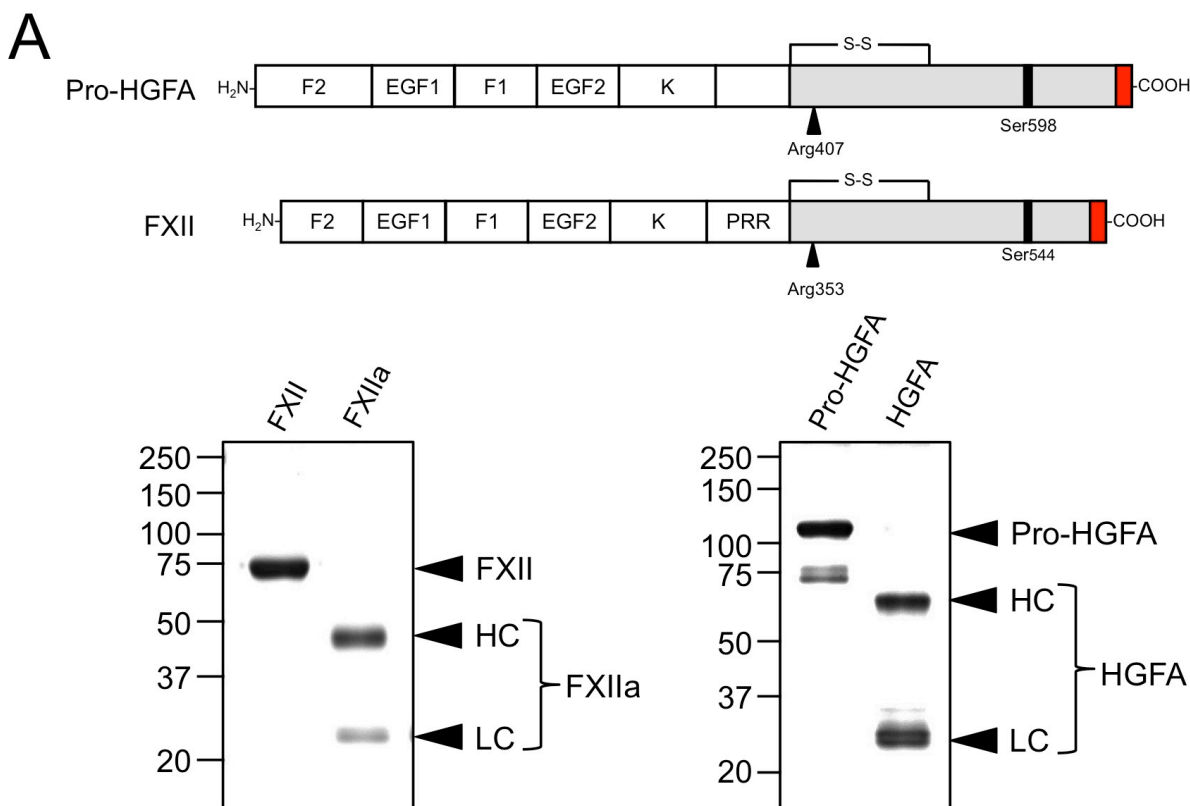

**Supplemental Figure 4. Cladogram depicting relationships of vertebrate organisms.** Numbers indicate estimated ages of points of divergence in millions of years. Green lettering indicates estimated points of origin of protein components of the vitamin K-dependent plasma thrombin generation mechanism (factors II, V, VII, VIII, IX, and X and tissue factor [TF, factor III]). The kallikrein-kinin system (factor XII, PK and HK) and FXI are indicated in blue. Red lettering indicates loss of the FXII and PK genes (-FXII, -PK) in certain lineages. Plasma factors indicated in non-italicized lettering are plasma proteases, while factors indicated in italics are non-enzymatic cofactors.

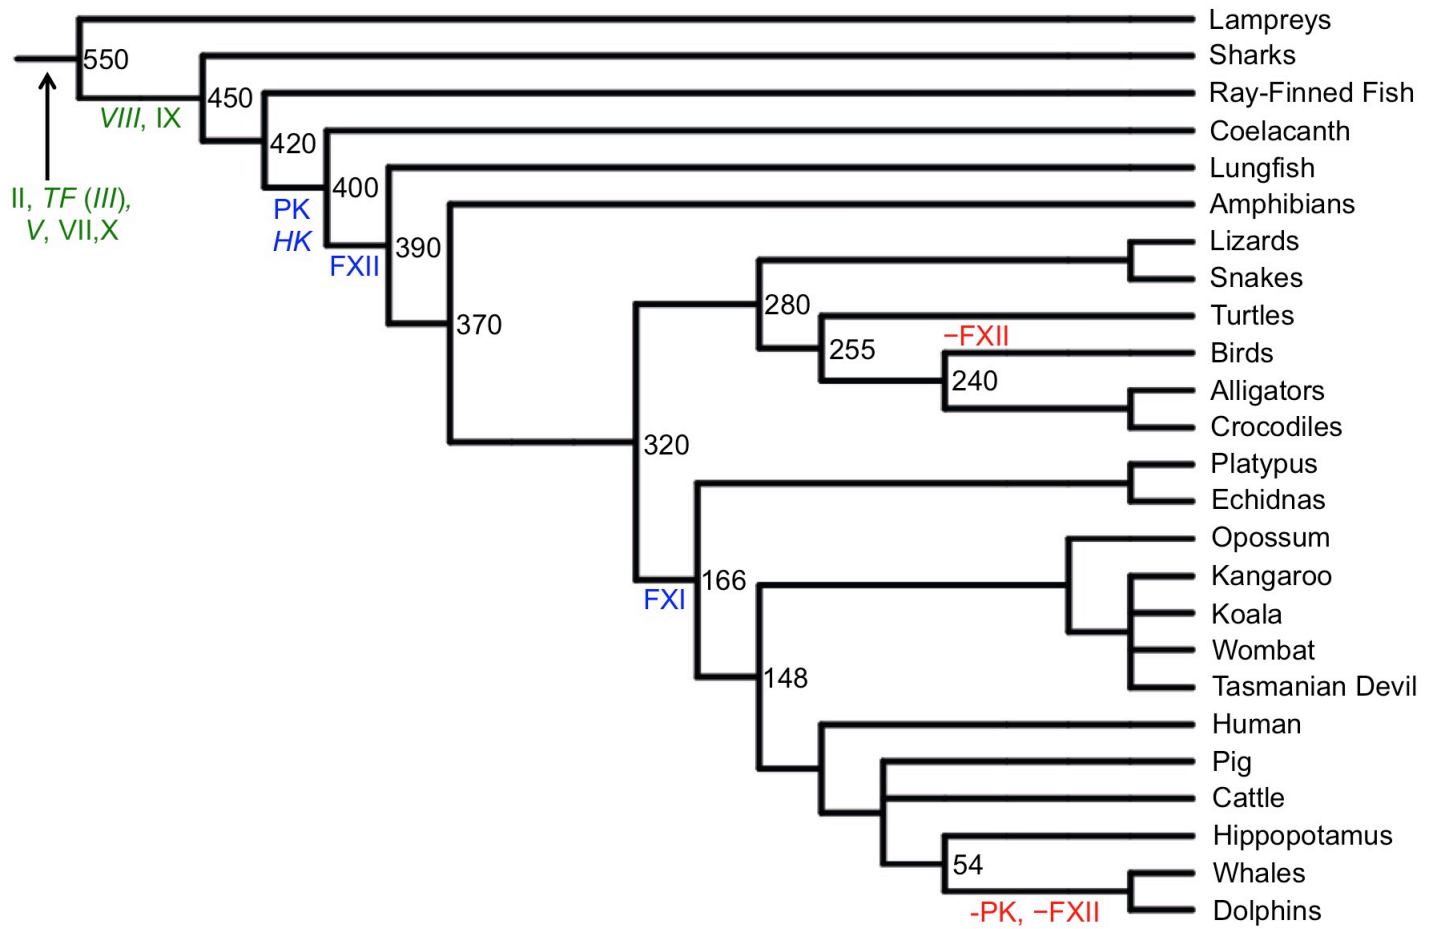



## Supplemental Figure 5. Prekallikrein Amino Acid Sequence Comparisons

Human (*Homo sapiens*)

Hippopotamus (*Hippopotamus amphibius*) (based on SRA SRR2183469)

Pigeon (*Columba livia domestica*)

Alligator (*Alligator mississippiensis*)

African Clawed Frog (*Xenopus laevis*)

West African Lungfish (*Protopterus annectens*, based on liver specimen 5 Accession: SRX1016236)

Coelacanth (*Latimeria chalumnae*)

Blue Highlight indicates residues of the catalytic triad

Residue 371 is the arginine immediately preceding the activation cleavage site.

X indicates presumed missing sequence

\*Amino acid numbering is for human prekallikrein

```

*1
Human      GCLTQLYENA FFRGGDVASM YTPNAQYCOM RCTFHPRCLL FSFLPASSIN DMEKRFGCFL KDSVTGTLPK
Hippopotamus ECLTQLYNNI FFRGGDVSGV FTPNAKYCQI VCTHHPRCCLL FTFLPASSTT DTDKRFGCFL KDSVTGTLPR
Pigeon      ECVTQTYENT YFQGGDLTVV FTSPSANYCQV VCTYHPTCLL FTYLPATWTK DPAKRFSCYL KDSDTEMPLPK
Alligator   ECVTQIYENT YFQGGDVMTV FTPNVNYCQI VCTYHPTCLL FTYLPPTGIH DPTKRFTCYL KDSKTEILPK
Frog        GCISELYQDS YWQGGDLRSV FAPDVEYQCL VCTFSPRCCLM FSYLPASWPK E-NERFACYL KESATNMLPK
Lungfish    GCVTQIYQDT YFQGPDLATY YSPDAAFCOM VCTFHPRCLY YTXXXXXXXXXX XXXXXXXXXXXX XXXXXXXXXXXX
Coelacanth  ECITELHDNI YFQGGDVSAV YAPDVKYCQI VCTYHPQCLF FTFLTETWTT R-EQRYACFL KDGDKIGTPS
  
```

```

71
Human      VH-RTGAVSG HSLKQCGHQI SACHRDIYKG VDMRGVNFNV SKVSSVEECQ KRCTNNIRCQ FFSYATQTFH
Hippopotamus VS-RTSAISG HSLKQCGDRI SACHRGIHEG LDMRGVNFNV SKVKSVEECQ EKCTNSIHCQ FFTYATQSF
Pigeon      VD-MEGAISG HSLKQCNIQI SACSPDVHIG LDMEGKIYDV TVADSYQQCQ KRCTNDNRCH FFTYASETFN
Alligator   VH-MDGAISG HSLKQCHAQI SGCSRDIHTG LDMQGINYNV TTEYSYQECQ KRCTNDNHCO FFTYATGAFH
Frog        VT-LTGAISG HSLKTCKSKI NVCRDKNFHG IDMIGTNYNV TWATNVQQCK EGCTNDIHCQ YFTYVTEQFH
Lungfish    PKTFNGAVSG HSLKQCSQSI SACTIENLYEG MDMXXXXXXXXX XXVDNFKECE KMCTNDPHCO FFSYATSKFH
Coelacanth  KVTLQGVISG HSLKQCDSL I DACFEEVHNG LDLMGINYHI TTVDSYQQCQ KTCTNDPHCO FFTYVTRDFH
  
```

```

140
Human      KAEYRNCLL KYSPGGTPA IKVLSNVESE FSLKPCALSE IGCHMNIFQH LAFSDVDVAR VLTPDAFVCR
Hippopotamus NAEYRNCLL KNSPQGTPS IKVLADVESG FSLKPCADSK IGCHMNIFQH RAFSDVNVAR II-PDAFVCR
Pigeon      NASFRKCLL KQASVGTPTS IKVLDEVVSG FSLKTCQLSE MDCQMDIFED QEFSGINIT S FFAPDISVCO
Alligator   SAGFRNKCLL KYTKTGPAS IRLNNAVSG FSLKLCQLSQ TDCRLDIFQD KEFSGNNIMS VFTPDTFVCR
Frog        SAPMRNRCYF KYSAKGMPTR IRLLDNVISG FSLKACGKSS LGCQNDLFQN MELPGETLTR VFAPDVHTCO
Lungfish    SASYRSMCLL KYTQSGTPKQ VKILENVISG FSLKSCQRSE KGCNSDLFQE IDFSGDDVTS VLTPDAEVCR
Coelacanth  CADLRNRCYL KYTMKGT PAR IRQLPNVVS G FSLKACGYSE KGCRDLDFPN VEFSGGDITS FMAPDANVCR
  
```

```

210
Human      TICTYHPNCL FFFTYTNVWK IESQRNVCLL KTSESGTPSS STPQENTISG YSLLTCKRTL PEPCHSKIYP
Hippopotamus TICTYHPNCL FFFTYTNVWK TESQRNVCLL KTSQSGTPSS PTPQENAI SG YSLLTCKQTL PEPCHSKIYS
Pigeon      TICTYFPKCL FFFFTKKEWQ IESQRNLCCL KTSTSGIPEA LTSRENAVSG FGLLNCRSL PA-CNSRTYT
Alligator   TICTYHPNCL FFFFTSEWE VETQRNLCCL KTSRSGIPSA YVERENAMSG FSLLNCRRLF PA-CHSHTYN
Frog        KICTFYPNCL FFFTYKKESE EPLQRNVCI RTSTKGIPDE GINKEHTISG FSLLSCKFSP SV-CPLTILS
Lungfish    LACTYHPTCL FFTXXXXXXXXX XESQRNRCYL KTSKSGQAAA PSHGHAI SG FSMLTCKXXX XXXXXXXXXXXX
Coelacanth  LICTYYPKCL FFFFMKTKWN RESQRNVCYL KTSESGDPLA PRAQENVISG FSLLSCKRPL SD-CGLKYFF
  
```

```

280
Human      GVDGGEELN VTFVKGNVVC QETCTKMIRC QFFTYSLLEPE DCKEEK-CKC FLRLSMDGSP TRIAYGTQGS
Hippopotamus QVDGGEELN VTFVEGANGC QETCTKMIRC QFFSYSLLPE DCRGER-CKC SLRLSLDGSP VRITYGTRAS
Pigeon      HMNFLGDELN VTYTKGHRAC QQVCTEVIRC QFFTYFSLQD SCNEEGKCEC HLRMSSNGSP VKIVHGPGRI
Alligator   DTNFLGDELN VTYVKGHKAC QLVCTDMVRC QFFTYFPLQE -CTQEGKCKC HLRMSSNGSP NRIVHEKGI
Frog        DAEFLGDELL VEEVSGEKEC QQECTNNIRC QFFTYRPMQS GCSENK-CKC HMKISSGLP TGIRHNGEI
Lungfish    XXTFSGNDIG TIDVTSTKAC QDACTNTDRC QFFTYTARAG TCKNQI-CKC YLKMSSGLP SGIQQSVGDI
Coelacanth  NYTFLGDDLQ RVDVLNHSVC RHQCNQDKRC QFFTYIPDSK AHDENK-FNC YLKR SKIGLP TEIQQVEAT
  
```

```

349
Human      SGYSRLRC-- -----NTGD NSVCTTKTST --RIVGGTNS SWGEWPQVS LQVKLTA--Q RHLCCGSLIG
Hippopotamus SGYSRLRC-- -----KSGE SSVCTTKNA-- --RIVGGTNS SWGEWPQVS LQVNLRP--Q SHLCCGSIIG
Pigeon      SGYSRLRC-- -----KKKA STVCMQHSAR TIRIVGGTDS APGEWPQVS LHVKLSR--R RHVCCGSIIS
Alligator   SGYSRLRCQR KANTVFKS-I SIACMQPSKE SIRIVGGTDS SPGEWPQVS LQVKLST--Q KHLCCGSIIS
Frog        SGFSLRLC-- -----KIKS VKCCGEPHIEH ANRIVGGTDS VLGEWPQVS MHLRLTASYK KHACGSIIS
Lungfish    SGFSLRLCXX XXXXXXXXXXXX XXXXXXXXXXXX XXRIVGGVNA EIKEWPQVS LQIKANT--I KHVCCGS--N
Coelacanth  SGFSLRLC-- -----RNKIP SVCCGQAVEF ATRIVGGTNS SVREWPQVS LHGNVGS--Y RHMCCGSIIN
  
```

## Supplemental Figure 5. Prekallikrein Amino Acid Sequence Comparisons (continued)

|              |            |            |            |            |            |            |      |            |            |            |     |
|--------------|------------|------------|------------|------------|------------|------------|------|------------|------------|------------|-----|
|              | 407        | 415        |            |            |            |            |      |            |            |            |     |
| Human        | HQWVLTAAHC | FDGLPLQDVW | RIYSGILNLS | DITKDTPFSQ | IKEIIIHQNY | KVSEGNH    | DA   | LIKLQAPLNY |            |            |     |
| Hippopotamus | HQWVLTAAHC | FDGLPLSDVW | RIYGGILNLS | EITKETPFSQ | IKEIIIHQNY | KISEGGH    | DA   | LIKLETPLNY |            |            |     |
| Pigeon       | NQWILTAAHC | VMSLANPNIW | HVYAGILKQS | EINEDTPFFK | VEEIIVHPQY | KYARTGY    | DA   | LMKLDKPMNF |            |            |     |
| Alligator    | DRWILTAAHC | TDGYESPNIW | RVYTGILKQS | EINEDTPFFR | VQDIVIHPQY | VIAETGY    | DA   | LMKLDKPMNF |            |            |     |
| Frog         | NQWIVTAAHC | FAMHPLQMW  | IYSGVVKLS  | NITQSTPFSE | TEQIIIHPHY | TGAGNGT    | DA   | LLKLKTPISF |            |            |     |
| Lungfish     | SLWIITAAHC | FDVIKKPETW | RIYAGFFQXX | XXXXXXXXXX | XXXXXXXXXX | XXXXXXXXXX | VVA  | LLELTPINF  |            |            |     |
| Coelacanth   | KNWIVTAAHC | FERLKNPDDW | HIYSGFLKQS | EMNDDAPFFS | VHTIIVHPQY | CAIEHVY    | DA   | LLKLQEPMY  |            |            |     |
|              |            |            |            |            |            |            |      |            |            |            |     |
|              | 477        |            |            |            |            |            |      |            |            |            |     |
| Human        | TEFQKPICLP | SKGDTSTIYT | NCWVTGWGFS | KEKGEIQNIL | QKVNIPLVTN | EECQKRYQDY |      | KITQRMVCAG |            |            |     |
| Hippopotamus | TDSQKSICLP | SKDDTKTIYT | DCWITGWGFT | EEKGKIQNTL | RKAKVPLVSN | EECQRSYRDY |      | KITQRMVCAG |            |            |     |
| Pigeon       | TDLQLPICLP | SKEDADILYT | DCWVIGWGYR | KEKGRVEDIL | QKATVPLMSR | EECQARYRKR |      | RIGDKVICAG |            |            |     |
| Alligator    | TDFQQPICLP | SKEEANIVYT | SCWVIGWGYA | KERGQITDIL | QKANIPLVSE | EECQSRVQEQ |      | TINNKVICAG |            |            |     |
| Frog         | NDHQKAICLP | PREPTFVLPN | SCWITGWGFT | EESGSLSNIL | QKAEVPIST  | EECQGNVEQT |      | RIDKKILCAG |            |            |     |
| Lungfish     | TECQMPICLP | QKDVKMESYE | SCYSTGWGYT | QEQGSVSDIL | QKALIPQI-- | DVCQSKYKNY |      | NISDLLLCAG |            |            |     |
| Coelacanth   | TDYMLPICLP | ETKFESN-YE | DCWVTGWGYT | SEAGHVNNIL | QKASVPVITN | EDCQSYYSY  |      | NITESMLCAG |            |            |     |
|              |            |            |            |            |            |            |      |            |            |            |     |
|              | 547        | 559        |            |            |            |            |      |            | 619        |            |     |
| Human        | YKEGGKDA   | GDSGGPLV   | CK         | HNGMWR     | LVGI       | TSWEGG     | CARR | EQPGVYTKVA | EYMDWILEKT | QSSDGKAQMQ | SPA |
| Hippopotamus | YKEGGKDA   | GDSGGPLV   | CK         | HDDVWHL    | LVGI       | TSWEGG     | CARR | DHPGVYTKVA | EYMDWILEKT | QDGGGPSSMK | -PA |
| Pigeon       | YDEGGRDA   | GDSGGPLS   | CK         | HEEVWYL    | LVGI       | TSWEGG     | CARP | RQPGVYTKVA | EYSDWIEKT  | T          |     |
| Alligator    | YKEGGKDA   | GDSGGPLS   | CK         | HEQIWYL    | LVGI       | TSWEGG     | CARP | ELPGVYTKVA | EYVEWILEKT | T          |     |
| Frog         | YKRGKIDS   | GDSGGPLA   | CV         | VDEIWYL    | TGI        | TSWEGG     | CARP | GKPGVYTRVS | EFTDWIEHT  | RV         |     |
| Lungfish     | FKEGGIDA   | GDSGGPYV   | CK         | RLEAWHL    | MGI        | TSWEGG     | CAXX | XXPGVYTKVA | YFFDWISRHV |            |     |
| Coelacanth   | YKEGGIDA   | GDSGGPFV   | CQ         | YEQTWYL    | QGI        | TSWEGG     | CARP | DRPGVYTRVG | YFKDWILKHV |            |     |

## Supplemental Figure 6. Comparison of Prekallikrein and Kalliklectin.

Shown are alignments for the apple domains of human and coelacanth prekallikrein and kalliklectin from the goosefish (*Lophiomus setigerus*), The numbering system is for human prekallikrein. **R** indicates the arginine residue at the activation cleavage site for prekallikrein.

```
Human PK      GCLTQLYENA FFRGGDVASM YTPNAQYCOM RCTFHPRCLL FSFLPASSIN DMEKRFGCFL KDSVTGTLPK
Coelacanth PK ECITELHDNI YFQGGDVSAV YAPDVKYCQI VCTYHPQCLF FTFLTETWTT R-EQRYACFL KDGDKIGTPS
Kalliklectin ECIPQLVKDM DFPGSDIENV FAPDAEHCQK LCTEHPKCLF FTFVEPEWTR D-SRNYCYL KYTSTGKPNs
```

```
71
Human PK      VH--RTGAVS GHSLKQCGHQ ISACHRDIYK GVDMRGVNFN VSKVSSVEEC QKRCTNNIRC QFFSYATQTF
Coelacanth PK KVT-LQGVIS GHSLKQCDL IDACFEEVHN GLDLMGINYH ITTVDSYQQC QKTCTNDPHC QFFTYVTDRF
Kalliklectin QVVVVDATAG YSLKPCPKQ -KSCVSKVYE DVDFNGADYE SLFVDNQNEC QKVC TNDPFC QFFTFVENGY
```

```
139
Human PK      HKAEYRNNCL LKYSFGGTPT AIKVLNVES GFSLKPCALS EIGCHMNIFQ HLAFSVDVDA RVLTPDAF--
Coelacanth PK HCADLRNRCY LKYTMKGTPA RIRQLPNVVS GFSLKPCGYS EKCRLDLFP NVEFSGGDIT SFMAPDAN--
Kalliklectin KQONIRNCKH LKFSWTVPII PVVVANPGVI SGFSCNAKMS P-ACGEVCKS ELFPD TDIPG SDLLALPAAS
```

```
207
Human PK      ---VCRTICT YHPNCLFFTF YTNVWKIESQ RNVCLLKTSE SGTPSSSTPQ ENTISGYSLL TCKRTLPEPC
Coelacanth PK ---VCRLICT YYPKCLFFTF MTKKWNRESQ KNVCYLKTSE SGDPLAPRAQ ENVISGFSLL SCKRPLSD-C
Kalliklectin SPQHCQALCS AHPKCTFFSF DSNAFK---- ---CYLKNNP DYLEKTKKAG WT--SGLPAR NQMDKKWLM
```

```
274                                     321 326
Human PK      HSKIYPGVDF GGEELNVTFV KGVNVCQETC TKMIRCOFFT YLLPEDCKE EKCKFLRLS MDGSPTRIAV
Coelacanth PK SLKYFFNYTF LGDDLQVVDV LNHSVCRHQC NQDKRCOFFT YIPDSKAHDE NKFNCYLKRS KIGLPTEIQQ
Kalliklectin IQYDGVDF--F RGS DIRVEM DDPDTCQKTC DEDSNCOFYT YVRNSSTAVV HRRRCYLKRV ITMPAPPRVS
```

```
344                                     371
Human PK      GTQGSSG-YS LRLCNTGDNS V-CTTKTST- -R
Coelacanth PK GVEATSG-FS LRLCRNKIPS VQCGQAVEFA TR
Kalliklectin KLTNVVSGFS RRNCI
```

## Supplemental Figure 7. High Molecular Weight Kininogens.

D5 domain His rich domain

D6 domain interacts with prekallikrein and Factor XI

Bradykinin-like motif is shown in red

\*Amino acid numbering is for human factor XII.

|                    |                | *1              |             |             |             |            |  |
|--------------------|----------------|-----------------|-------------|-------------|-------------|------------|--|
| Human              | MKLITILFL---C  | SRLLSLTQE       | -SQSEEIDCND | KDLFKAVDAA  | LKKYNSQNQSN | NQFVLYRITE |  |
| Dog                | MKLLAMLFL---C  | SRLPLSLTQE      | -SLSEEIDCND | EDLFKAVDTA  | LKKYNSRNQSG | NQFVLYRVTE |  |
| Siberian Tiger     | MKLIIVLFL---C  | SRLPLSLTEE      | -SFSQDIDCND | EDLFKAVDTA  | LKKYNSRNQSG | NQFVLYRVTE |  |
| Grizzly Bear       | MRLALLLFL---C  | SRLPLSVSQE      | -SSQE-IDCDD | EDLFKAVDTA  | LKKYNSRNQIG | NQFVLRHVTE |  |
| Hippopotamus       | MKLITILFL---C  | SRLPLSLTQD      | -SLQE-IDCND | QDVFEAVDTA  | LKKYNSGNKSG | NQFVLYRVTE |  |
| BN Dolphin         | MKLITILFL---C  | SRLPLSLTQD      | -SSQE-IDCND | PDVFQAADTA  | LKKYNSGNKSG | NQFVLYRVTE |  |
| Opossum            | MKLAVVL-L-L-V  | TSQL-NVQGE      | -S--E-VSCQD | NDVFRAMDAA  | LTEYNNQKTSG | NQFVLHQIMA |  |
| Koala              | MELAAIL-L-L-V  | A-IQLNVQVV      | -SQVKDVACDD | NDVFQAVDVA  | LTKYNNQKSSG | PQFVLYRIIT |  |
| Wombat             | MELAVIL-L-L-V  | AS-QLNVQVE      | -SQVKDVACDD | NDVFRAVDVA  | LTKYNNQKSSG | PQFVLYRIIT |  |
| Platypus           | MKLLGVL-L-F-L  | GSSLLPSRTA      | -PVPQDVCND  | SDVFKAVDRA  | LRWYNEHLKDG | NQFLLYRVTE |  |
| Kiwi               | MKPFLAI--VL-C  | CSFFSSRATP      | -LPFEFSDCDD | PDVLEAVDTA  | LKKYNGGRTTG | NQFALYVMME |  |
| Pigeon             | MKPFLVL--AL-C  | CSFLSSRATP      | -LPFEFLDCDD | PDVFKAVDAA  | LQEYNGDRASG | NQFALYTVVE |  |
| W-T Tropicbird     | MKLFIVL--AL-C  | CSFFSSRATP      | -LPFEFSDCDD | PDVFKAVDTA  | LKKYNGDRGTG | NQFALYVMME |  |
| Alligator          | M-----L-C      | CLFKSTND        |             |             |             | DFMLL----- |  |
| Green Sea Turtle   | MKLSTVL--VL-C  | CSFFSSRASP      | -LPTQDADCDD | PDVFEAVDIA  | LRKYNGDKTDG | NQFALYVMME |  |
| E Brown Snake      | MEVFI-LLLLGIGF | CQAARDKVDR      | -----ND     | PEVVDAVAGA  | IAALNEDRSHG | NKLALGAILH |  |
| Anolis Lizard      | MELFILLVLTFC   | C---KQAVP       | -LEGEDADCDS | PDVFSAVDLA  | VKAHNEDQKHG | NLFALRVILA |  |
| Xenopus leavis     | MKHLFSF--IFF-  | LHLL--RG-S      | ASQTIEADCND | HNIFYAVDEA  | LRHHNKELIDG | NQFVLYRITE |  |
| Xenopus tropicalis | MQHLFTF IVF-   | LHLL--RG-S      | ATQAIEADCND | HNIFNAVDEA  | LRHHNRALTDG | NKFVLYRITE |  |
| Nanorana parkeri   | MVV-----VVV-   | VGGDS AAVP      | V-PDIGVDCDD | PNIFKAVDEA  | LRYNDAKEDG  | NQFLLFRV-- |  |
| Coelacanth         | MKVLALV--LL-C  | TKLYVSWAK-      | -SLLQPADCGD | PRVHQAVDAA  | IKKYNEELKDG | HQFALYRITK |  |
| Zebrafish          | MARDKILTVLA-M  | LWLYFCGGLA      | -QTDSSVPCDD | RRVEKVVNLT  | LGTHNKMITEG | AQLALYEIL- |  |
| Pufferfish         | MRSGLGLCVLG-L  | LCLSSSVR-A      | -QEPVKVSCDD | PSVEKAVSSA  | VEKFNEKLTG  | NKLALFQIQ- |  |
| Elephant Shark     | MKLFVLLFSSQLLH | SNARSVSDIDS     | VDPIPIDCDD  | PELLKAVDFT  | LRKFNGERRTT | HQYALDRVS- |  |
| 44                 |                |                 |             |             |             |            |  |
| Human              | ATKT-VGSDTF    | -Y-S-FKY-EIKEG  | -DCPVQSGKT  | WQDCDYKDAA  | KAATGECTAT  | VGKRSSTKFS |  |
| Dog                | GTRT-DDPDTF    | -Y-S-FKY-QIREG  | -NCSVQSGKT  | WQDCDYKEST  | QAATGEC SAT | VGKRGKTKFS |  |
| Siberian Tiger     | VTRT-DDPETF    | -Y-S-FKY-QIREG  | -DCSVQSDKT  | WQDCDYKESA  | QAATGEC SAT | VGKRGNTKFS |  |
| Grizzly Bear       | VVRT-DDPDTF    | -Y-S-FKY-QIREG  | -NCSAESGKT  | WQECDYKDAA  | QAATGEC SAT | VGKRGNTKFS |  |
| Hippopotamus       | VTRM-DNPDTF    | -Y-S-FKY-QIKEG  | GDCPVQSNKT  | WQDCDYKDSA  | QAATGECTAT  | VAKRGNMKFS |  |
| BN Dolphin         | VIRT-DDPDTF    | -Y-S-FKY-QIKEG  | -NCPVQSDKT  | WQDCDYND SA | QAATGECTAT  | VAKRGNMKFS |  |
| Opossum            | VSLT-ESSQRT    | -F-T-VTY-NIQEG  | -DCHVRMGKN  | WKECGIKKDL  | NKERGOCTAI  | VKSHNEEFT  |  |
| Koala              | ASLT-DSSERT    | -F-T-ITY-EIRES  | -NCMIETGKN  | WKECSYKDSA  | EWKQGECTAI  | VKSQNGKEFK |  |
| Wombat             | TASL-TDSNER    | -T-F'TITYE-IRE- | SNCMIETGKN  | WKECSYKDSA  | KWEQGECTAI  | LKSQNGKEFK |  |
| Platypus           | ASMT-TDSDTF    | -Y-S-LKYQ-IREG  | -DCPVQKDKH  | WQDCDYREAA  | EAATGECTAT  | VKTKNKEKFT |  |
| Kiwi               | GKKT-AGPDTQ    | -F-Y-VKYQ-IRET  | -SCAIEENKH  | WKDCDYKAPA  | EAKTGECTAR  | VHINKAEKTS |  |
| Pigeon             | AKRT-VGPVTQ    | -F-H-VKYR-IRET  | -TCATEENKL  | WQDCDYKASA  | EAQTGECTAQ  | VHLNDAEKTS |  |
| W-T Tropicbird     | AKKT-ASPDTQ    | -F-Y-VKYR-IQET  | -TCAIEENKL  | WQDCDYKVPS  | EAKTGECTAR  | VHMYNTEKTS |  |
| Alligator          | FFSQ-AGPGAQ    | -F-F-VKYR-IRES  | -TCAIGEGKA  | WQDCDYNAAV  | EAETGECTAE  | VYIDKTQKIS |  |
| Green Sea Turtle   | AKRI-EGSGKQ    | -F-F-VMYR-IRES  | -SCAVGGDKL  | WQDCDYRASA  | EAESGECTAQ  | VYVDKTEQIS |  |
| E Brown Snake      | AYRI-ADPRKK    | -FLIIYHVR--ETV  | --CPIAVDKP  | WQKCELLRTS  | KAHSGKCTAN  | IDINESEQFT |  |
| Anolis Lizard      | ARRT-AGPGKN    | -F-L-IKYQ-LAET  | -SCPLKGSVS  | WQNCDFLPPS  | EGDSGECTAE  | IHTDSDQVFS |  |
| Xenopus leavis     | ARI-KTEN-GG    | -T-HNFVSYDIREG  | -SCGVKSGKV  | WQNCDFKQSD  | E-KVGKCSAH  | IVVNKELKTS |  |
| Xenopus tropicalis | AKI-KIENDSG    | -T-HNFVSYDIREG  | -SCGVKSGKV  | WQNCDFKQSD  | E-KVGKCSAH  | VLVNKELKSS |  |
| Nanorana parkeri   | TDA-KQRNDEN    | GQIHYFLDYEIREG  | -SCTVKSMSHS | WQDCQFQAHT  | P-EQGKCSAH  | LLINTEKKIR |  |
| Coelacanth         | AKTQ-LE-KE-    | ---THYFVTYEIRE  | STCSVHDNKI  | WQECNYVSP I | SATTGCTIAE  | VYIDETVKTS |  |
| Zebrafish          | ----EATKAQN    | ESGDVLLVRFSSRE  | TDPCPAGGEKT | WHECDYLQQA  | DKALRIC HAK | VQFTEAGEEL |  |
| Pufferfish         | ----SASKTGS    | GADAVYSLQFTSRR  | SDCPAGGIKP  | WTDCDYLP RR | -KSPVPCSAI  | VHVTATEVNT |  |
| Elephant Shark     | ----FGTVQR     | KRGSRYFIKFDIQE  | SNCLVSESEKT | WTECDHRPPT  | VANIGHCESS  | VYIHRAGRIL |  |

Supplemental Figure 7. High Molecular Weight Kininogens (continued).

|                    | 103          | 114          |         |        |             |            |                  |
|--------------------|--------------|--------------|---------|--------|-------------|------------|------------------|
| Human              | -VATQTCQITP  | AEGPVVTAQY   | DCLG--- | CVHPIS | TQSPDLEPIL  | RHGIQYFNNN | TQHSSLFMLN       |
| Dog                | -VATQTCQITP  | AEGPVVTAQY   | DCLG--- | CVHPIS | IASPELEPVL  | RHAIEHFNNN | TDRSHLFALR       |
| Siberian Tiger     | -VATQTCQITP  | AEGPVVTSQY   | DCLG--- | CVHPIS | TASLDLEPVL  | RHAIQHFNNH | TGRSHLFALR       |
| Grizzly Bear       | -VATQTCQITP  | AEGPVVTAQY   | DCLG--- | CVHPIS | TASPDLEPVL  | RHAIEHFNNN | TAHSHLFAVR       |
| Hippopotamus       | -VATQTCQITP  | AEGPVVTEQY   | NCLG--- | CMHPIS | TTHPDLEPVL  | RHAIQHFNNN | TDHSHLFELR       |
| BN Dolphin         | -VATQTCQITP  | AEGPLVTAQY   | DCLG--- | CLHPIS | TESPDLEPVL  | RHAIQHFNNN | TDHSHLFDLK       |
| Opossum            | -ITEQHCKIIP  | VNDEVIAVNV   | PCLG--- | CYRPIS | ANEDDLQAVL  | NNAVEQFNYQ | SQSDHLYTLK       |
| Koala              | -VIEQNCHIIP  | AHDVVVAVHS   | PCLG--- | CFNPIS | TNHSDLLEIL  | KHGLQSFNEK | SKHEYLFALK       |
| Wombat             | -VIEQNCHIIP  | AHDVVVAVHR   | PCLG--- | CFNLIS | TNHSDLLEAIL | KHALQSFNEK | SKHEYLFDLK       |
| Platypus           | -VSLQTCQITP  | AEGPVITAHY   | ESG---  | CIHPIS | PTSTDLLIPIL | KHGLQHFNNR | TNHPFLFRVN       |
| Kiwi               | -NVSQDCKTVP  | ATATIIPAEA   | LCLG--- | CYYPIS | SDSLQVSEIL  | KQAIQKFNHR | SDEALFKLV        |
| Pigeon             | -NVSQDCKISP  | ATPKVTRTEA   | TCLG--- | CFHPIS | SDSSEVSEIL  | KQAIQKFNHR | SAESALFKLV       |
| W-T Tropicbird     | -NVSQDCKIFP  | AMPKITVTEA   | TCLG--- | CFHPIS | SDSSGVSEIL  | KQAIQKFNHR | SAEPALFKLV       |
| Alligator          | -NVSQECKIIP  | AAGKVTLSPA   | PCLG--- | CYHPIS | GNSLDLLPIL  | RYAIRNFNKE | SQKSFLYEVG       |
| Green Sea Turtle   | -NVTQECKIIP  | VEGKVVLSHV   | QCLG--- | CYHPIS | GDSLQLLPIL  | RYAIRFNNQ  | SEQSSLFEVG       |
| E Brown Snake      | -SISQNKISQ   | GQQNIEQSHV   | EFVGLSQ | CVGCWH | RIKTLSRVL   | HIVRHTVRQF | NNQSQHSSLF       |
| Anolis Lizard      | -SVFQTCRITT  | APGKVTRSHA   | RCLG--- | CWHTIS | SKSEELVPIL  | RRAIYLFNNE | SDQQPLFDAV       |
| Xenopus leavis     | EVIIQNCSTFQ  | V-EPTVSAIKQ  | DCLG--- | CPINLD | TRNKDLLPLI  | KSAIEKMNKL | ANYPFYFDLE       |
| Xenopus tropicalis | EVIFQNCSTFK  | V-EPTVTAVEQ  | GCLG--- | CPIKLD | TTNEELLPLI  | KVAMEKMNV  | ANHPFYFNLE       |
| Nanorana parkeri   | TVVSQTCQSVSK | VPLEPYVTAVHH | QCLG--- | CPYPID | TNNEEVLRFV  | HIAIEKMNRQ | GSHLYYFDLD       |
| Coelacanth         | -VVSQCKDLVP  | -PKDPVPSVA   | QCLG--- | CPREIP | TNSSKVQVVL  | DAALKKYNKE | SNHSFHF---       |
| Zebrafish          | --LLHDCLEPA  | -----IIASVA  | PCIVTEE | CHPLLE | KTEVLKCNSS  | VDVAPWRHEV | PEVHVVCEAGVSKTNS |
| Pufferfish         | --RHVEQIDG   | ----HFTPEKA  | PCLG--- | CEMEID | ENSEDLKSPL  | SVSITKYSM  | SNSLHLFTLN       |
| Elephant Shark     | EVTMYNCTIIP  | VNDPWIVPKIA  | PCLG--- | CAISLP | HNSSRAKETL  | DYSIKKFNSD | SNYPNIFGSE       |

|                    | 163        |            |             |             |             |            |  |
|--------------------|------------|------------|-------------|-------------|-------------|------------|--|
| Human              | EVKRAQRQVV | AGLNFRITYS | IVQTNCSKENF | LFLTPDCKSL  | -WNGDTGECT  | DNAYIDIQL  |  |
| Dog                | EVKKAHRQVV | TGWNYEITYS | IEQTNCSKENY | LFLTPDCKSL  | -LNGDIGECT  | DHAHMDLQL  |  |
| Siberian Tiger     | EVKRAHRQVV | AGWNYEITYS | IVQTNCSKEHF | LFLTPDCKSL  | -LNGDIGECT  | DHAHVDLQL  |  |
| Grizzly Bear       | EVKRAHRQVV | AGWNYEITYS | IAQTNCSKENF | LFLTPDCKSL  | -LNGDIGECT  | DHAHMDLQL  |  |
| Hippopotamus       | XXXXAQRQVV | AGWNYEITYS | IVQTNCSKENF | LFLNPDCKSL  | -PSGDVGECT  | DKAYVDIQX  |  |
| BN Dolphin         | EVKKAQRQVV | AGWNYEITYS | IVQTNCSKENF | LFLTPDCKSL  | -SNGNIGECT  | DKAYVDIQL  |  |
| Opossum            | DVLKALRQVV | RGWNYDLEFT | VVETNCVKSEV | KNVTSECKPL  | -PQGKSMACR  | ELSHVSPDM  |  |
| Koala              | EVMNASRQVV | NGWNYKIQYS | IVQTDCKSKED | GQLSDKCKPT  | -PQGEISVCS  | DFTYVDPQM  |  |
| Wombat             | EVMNASRQVV | NGWNYKVQYS | IMQTDCKSKED | GQLSAKCKPV  | -PQGEISVCS  | DFTHVDPQM  |  |
| Platypus           | EVKKAQRQVV | SGWNFDVHYT | IIQTNCSKQDF | EELLPDCKPM  | -PGGDTGDCS  | DKAFVDPHM  |  |
| Kiwi               | EIKEAKRQVV | AGWNYIIKYE | IKETNCSKDQF | QDLSPECKTT  | -STGRVGNCE  | AKAYANLND  |  |
| Pigeon             | EIKEATRQVV | AGWNYIIKYE | VEETNCSKDQF | QDLTPECKTT  | -SRGHIGKCD  | AKAYVNPQG  |  |
| W-T Tropicbird     | EIKEAKRQVV | AGWNYIIKYE | IEETNCSKDQF | QDLTPECKTT  | -SRGRVKGCD  | TKAYENLHA  |  |
| Alligator          | EIIKATRQVV | AGWNYAVEYM | VKETNCSKKEF | QDLSPKCKPI  | -FGGHVGNCV  | AKAFVDLSN  |  |
| Green Sea Turtle   | EIIKATRQVV | AGWNYAVEYE | VKETNCTKNNF | QDLSPECKPI  | -VGGHVGRCE  | AKAYVDLTN  |  |
| E Brown Snake      | GFPVINEAES | QVNVGNVYRF | KYSINETNCSK | KEFLDLSPECR | PLSGGLKVFCE | AKAYVDNRG  |  |
| Anolis Lizard      | GVVHAARQVV | AGWKYKFEYW | IQETNCSKADF | ADMAPECKIL  | -PKGHVGSCH  | VESYVDFRN  |  |
| Xenopus leavis     | NIIEATLQVV | AGWNYRLIYT | VRQTNCSKSIH | SNVPLEECDLD | -ANGQNGTCT  | TQVFKNTRG  |  |
| Xenopus tropicalis | TITEATRQVV | FGWNYKLFYT | IRQTNCSKSIH | SNVPLEECNFD | -ANGQNGTCT  | TQLFINTQG  |  |
| Nanorana parkeri   | QIVNATRQVV | GGWDYIINCV | VRKTNCSKMDF | KTKDSNECKLD | -KEGETGCE   | LQVSETPDG  |  |
| Coelacanth         | EIKRATSQVV | AGFKYRVEFR | ITETNCSKADF | -EELTEDC-SP | -ISATTGTCT  | AEVYIDETV  |  |
| Zebrafish K        | RFKRPPGWSP | LSKESISPPK | HVPLNCPKTPW | -KEFKPIIAPP | ---NATEPSEP | SADTALSDDL |  |
| Pufferfish         | SVGYATRQVV | AGFRFKIRFD | MKKTCAKSQH  | -SDLSDLQVPD | DQNMEFANCN  | STVDVAPWR  |  |
| Elephant Shark     | VIFKVTQVV  | AGLYLTKFS  | LRETECTKSSN | --DVWQDCILK | PDNATTLYCN  | STVLFSIRA  |  |

Supplemental Figure 7. High Molecular Weight Kininogens (continued).

|                    | 222         | 235         |          |        |            |            |             |
|--------------------|-------------|-------------|----------|--------|------------|------------|-------------|
| Human              | R-IASFSQNC  | IYPGKDFVQP  | PTKICVGC | CPRD   | IPVNSPELEE | TLTHTITKL  | NAENNATFYF  |
| Dog                | R-IASFSQKCE | LFPGEDFVQP  | PSRICLG  | CPCK   | IPVDSPELEV | PLTHSIAKL  | NAENNGTFYF  |
| Siberian Tiger     | R-IASLSQKCE | LYPGEDFIEP  | PPSICPG  | CPKE   | IPVNSPELEV | ALNHSTAKL  | NAENNGTFYF  |
| Grizzly Bear       | R-IASFSQKCD | LYPGEDFVQP  | -SKICSD  | CPKD   | IPVNSPELEV | ALNHSIAKL  | NAENNGTFYF  |
| Hippopotamus       | R-IASFSQKCN | VYPEEDFVAP  | PTRICAG  | CPPIR  | IPVDSPELEE | PLNHSIAKL  | NAENNGTFYF  |
| BN Dolphin         | R-IASFSQKCD | LYPGEDFVQP  | PTRICAG  | CPIS   | IPVNSPELEE | PLEHSIAKL  | NVENNGTFYF  |
| Opossum            | K-ISSHLQTC  | --TEADS-QF  | SD       | MOY    | ISGYSPELKE | SLRAALENF  | NSENESEDFYF |
| Koala              | K-ISIVSQACN | --PGSDSASS  | VT-----  | -QK    | MSVYSPELKE | PLRHSLEKI  | NSENKNNFYF  |
| Wombat             | K-ISIVSQVCN | -----P      | RSDSGSS  | VTQK   | MSIYSPELNE | PLRYSLEKI  | NSESKNNFYF  |
| Platypus           | K-ITGFVQNC  | LFPGAEWIPP  | PDLMCAG  | CPQN   | LPVDSPELKE | PLKHS�DKV  | NSADNYTFYF  |
| Kiwi               | Q-IIDTASQCK | FPAEETVDPP  | -TLICAG  | CPRP   | IPKTSPELKE | LLEVSMEKY  | NLETNDDFYF  |
| Pigeon             | Q-IVDIASQCK | LPVEKTVNPD  | ---IRTG  | CTKT   | IPVDSPELKE | LLKLSMEKY  | NSESNDDHYF  |
| W-T Tropicbird     | Q-IVDIASQCK | LPVEDTVVPA  | -TR--TNC | PKPT   | IPKDSPELKE | LLKVSMEKY  | NLESDDDFYF  |
| Alligator          | T-LVDVTQCK  | FPVEETVPPP  | --QMG    | CPCKR  | IPVNSPELKE | VLKASMEKY  | NSESDDDFYF  |
| Green Sea Turtle   | T-IADVAQCK  | FPVAETVSPH  | -ISICAG  | CPRP   | IPVNSTELEE | PLRATLEKY  | NAESNDDFYF  |
| E Brown Snake      | T-LIHSEVECR | PEAEDNMRI   | -AQAC    | CPCHSP | LAPDSQELKR | PLEAVVKLF  | NIKSSSDFYF  |
| Anolis Lizard      | T-IVNVEQKCE | LEVDTKKN--  | ----GPG  | CPRT   | IPSDSPQLKE | PLAAIVENY  | NTKCSNGFLY  |
| Xenopus leavis     | E-IIDINLSCF | SQ-----     | KG       | FCLSCP | DAVDV      | DDPELLDLLR | QVMDEYNSY   |
| Xenopus tropicalis | E-IKDINLECF | SQ-----     | KG       | FCLSCP | DAVDV      | DDPELLDLLR | QVMDEYNSN   |
| Nanorana parkeri   | Q-VNDIILKCT | SQAGVC----- | LNGL     | PLNVD  | DDAELQNL   | LLS        | QVIDEYNSN   |
| Coelacanth         | KTSEVVSQKCD | LVPKDP      | IIVP     | SVAQCL | GLCPRE     | IPVNSKVKV  | VLDAALKKY   |
| Zebrafish          | DLIR        |             |          |        |            |            |             |
| Pufferfish         | HELPQVQMECE | EGMLIMPLIK  | RRPPGWT  | PLRK   | FEKPGSAAKE | ESSEEDTAA  | AQPSASPVVD  |
| Elephant Shark     | NEIDTF-VSCS | TDPIGFQMEG  | FRSQPTET | TIGI   | LAQQRQRHRQ | HHFYQQQDS  | HEQHLINKSE  |

|                    | 282        |            |            |     |           |           |            |
|--------------------|------------|------------|------------|-----|-----------|-----------|------------|
| Human              | KIDNVKKARV | QVVAGKKYFI | DFVARETT   | CSK | ESNEELTES | ETKKGQSL  | DCNAEVYVVP |
| Dog                | KIDSQVSATV | QMVAGEKFFI | QFVARETM   | CSK | ESNEELAES | QINKYGEQL | KCEAEVYVIP |
| Siberian Tiger     | KIDHVKSATV | QVVAGKKFSI | EFTARETT   | CSK | ESNEELTES | NTNKGKIL  | DCAEVYVIP  |
| Grizzly Bear       | KIDSQVSATV | QMVAGKKFSI | AFIARETT   | CSK | ESNEELTES | QINKYGHLL | ECKAEVYVIP |
| Hippopotamus       | KIDMVQKATV | QVVAGKKYSI | AFTARETT   | CSK | ESNEELTKS | EIHKHGRLL | SCNADVYVVP |
| BN Dolphin         | KIDTVEKATV | QVVAGKKYSI | VFTARETT   | CSK | ESNEELTKS | EINKHSPIL | NCKADVYVVP |
| Opossum            | KPSILLKAHL | -VEPGEKHSI | EIQVQETE   | CSK | EKG-QFSED | EFKTDGRVL | QCIVQVPMGQ |
| Koala              | KMETIEKAES | PAGPGPKYII | EFLIKETE   | CSK | EKD-KYSED | AFKESGDGL | KCIANVSVED |
| Wombat             | KMDTIQKAES | LVGPEPKYII | EFLIKETE   | CSK | EKD-KYSED | TFKELGDGL | KCVANIPMED |
| Platypus           | KVETIRKATF | QLVAGQKFSI | EFLVRQTR   | CSK | EDNEKMPED | EVDSNGKVL | VGNAMVYVVP |
| Kiwi               | KAGDIEKATV | QVVAGKSYRI | TFTVKKTN   | CSK | KEFEKLNED | EATPNSVRL | KCEAQIYVIP |
| Pigeon             | KSGDIEAAAV | QVVGKIIYHL | EFAVRKTN   | CSK | KEFEKLHED | EFTSDSAPL | PCEAQIHVIP |
| W-T Tropicbird     | K-GEIEEATV | QVVAGQNYHL | IFAVRKTN   | CSK | KEFEKLNED | EATSDSAPL | PCEAHVHVIP |
| Alligator          | KVESVFHSTV | QVVAGKNYEI | EFLIGKTN   | CSK | SEVEKLNED | KIVIPKISL | QCTANIYVVP |
| Green Sea Turtle   | KAEVILYATV | QVVAGKNYNI | RFKIRKTN   | CSK | TDVKKLNED | VTTTDSKPL | LCTAQVYVIP |
| E Brown Snake      | KIVDITKISG | QMLVGHVYRI | DFKAQRTN   | CSK | AEVEKPKNC | HAVKGGELM | TCHALIYVVP |
| Anolis Lizard      | RITKVTKATV | QIVSGIMYRI | EFQITETN   | CSN | AEVHELNED | IAMENSESL | QCYGSAWEKP |
| Xenopus leavis     | SVDYASKKGV | HEKTYDVTFN | ---IKETN   | CSK | SDYAILGEE | QFIETKNAL | NCDAKVNVTD |
| Xenopus tropicalis | SVNQASKKGT | HEKTYDVKFN | ---IQETN   | CSK | SDYSILGEE | EFIETKEAL | NCDAKVNITD |
| Nanorana parkeri   | QVIKATKHGF | QEIQIYEVLF | ---MMPTV   | CSK | PDHTILGDE | NNLENASPL | SDTTIKVTD  |
| Coelacanth         | GVVEIKRATS | QVVAGFKYRV | EFRITETN   | CSK | KDFEELTED | AISEK-NPH | NNSATTVVP  |
| Zebrafish          | VVPDDPLHCP | SK         |            |     |           |           |            |
| Pufferfish         | DPLHCP     | SKVV       | PD         |     |           |           |            |
| Elephant Shark     | PAVITTSAPL | ELPLSAIDQL | ADLLGPEPPV | N   | CPGKPKPL  | QSN       |            |

Supplemental Figure 7. High Molecular Weight Kininogens (continued).

|                    | 342            | 358         | 384                                                  |
|--------------------|----------------|-------------|------------------------------------------------------|
| Human              | -WEKKIYPTVN -- | CQPLGMIS-LM | KRPPGFSPFRS SRIGEIKEET TVSPPHISM --APAQDEERDS        |
| Dog                | -WEKKIYPTVN -- | CQSLGKVI-LM | RPPGFSPFRS SFMEKTEKGT TVSSPHNSM --VPVQDEEWDS         |
| Siberian Tiger     | -WEKKIYPTVH -- | CQSRGETT-LM | KRPPGFSPFRS VQVEKTKEGT TVSPPHISM --ASVQDEEQDS        |
| Grizzly Bear       | -WEEKIYPTVN -- | CQPLKKII-LM | KRPPGFSPFRS VPLEKTEEGT TVSSPHISM --APVQDEERDS        |
| Hippopotamus       | -WEEKIYPTVN -- | CQPLGQTS-LM | KRPPGFSPFRS VQVEKTKEGT TVSPPHISM --APEQDEERDS        |
| BN Dolphin         | -WEKKIYPTVN -- | CQSLGQTT-LM | KRPPGFSPFRS VPVEKTKEGT IVSPPHFTL --APVQDEERDS        |
| Opossum            | DGEVKPVI--D -- | CHEPPPELGLM | KRPSGFSPFRS AL--RILEEK IIAAREPQN FNTTEQEEEQTP        |
| Koala              | --EGTFNPTVR -- | CEHPTEM--LM | KRPPGFSPFRA AAVIPEMEGA EAPSEPQTS -DMTDQEEAQGP        |
| Wombat             | --EGTFNPTVH -- | CEQPTM--LM  | KRPPGFSPFRA AALIPETNGA EAPSEPQTS -DTTDQEEAQ-P        |
| Platypus           | -WKNEVFPTVT -- | CQDLEMSSFL- | KRPPGFSPFRS VQT-PAKEGS NVSPQPQPK -APDREEE-QA-        |
| Kiwi               | -WENKILPQVN -- | CTEELLPVFLA | RPPGFTPFRT AQYFAQSQPD TTS----- -SNKNETES             |
| Pigeon             | -WENKILPQVN -- | CSIERSAAVLL | RPPGFTPFRS --FVALGQPN ENSCSDQNE KEMQRPGEETG          |
| W-T Tropicbird     | -WENKIFPQVN -- | CSKERSMTVLL | RPPGFTPFRS FAMLSQLPS-E IL-CSDKNE EERQTPGKEMR         |
| Alligator          | -WKQEIFPQVN -- | CSEVTPIIQAR | RP-PGFTPFRS L-MLHEIYPQ TSPLQTAEE GKDPDKGPRENLGPGLENE |
| Green Sea Turtle   | -WTKTIRPKVS -- | CAEENLLMRR  | PPGFTPFRS LAVEAKTVQY T-PQIKNEK GPREGQGRGKSGK         |
| E Brown Snake      | -WEPSVVPEVT -- | CTDDQPFQAE  | LEEPNILEDF NIFHDYEEQK WFLWYLLGRY TLSVILKLF           |
| Anolis Lizard      | -WQPKSEVEVT FK | CMEKAFNTALL | RPPGFTPFRS AAMATEEN-- TQVCGHRH- GHKNGHNKTKPKSSEDLQE  |
| Xenopus leavis     | -TKIIVASSPI -- | CNARARTMEFL | NQFLAKMGDNT IFVVYSAMFT YKGLSPFRG VLPQGSPIRI          |
| Xenopus tropicalis | -TKITVASSPM -- | CIHRVRST--- | -----PFFS ----- YKGLSPFRM VLPQANPSNK                 |
| Nanorana parkeri   | -KRINVHSGPV -- | CVEQQA----- | -----LIMR LSGLSPLRM SKKPDQAEATN                      |
| Coelacanth         | -WKNTTTTDVN -- | CVL---EMALL | RLPAGMSPFRV LQATPDSAK- -----                         |
| Zebrafish          |                |             |                                                      |
| Pufferfish         |                |             |                                                      |
| Elephant Shark     |                |             |                                                      |

|                    | 402                                                                        |
|--------------------|----------------------------------------------------------------------------|
| Human              | GKEQGHTRRH -DWGHEKQRKH NLGHGKHKE RDQGHGHQRG HGLGHGHEQQ HGLGHGKHFKL         |
| Dog                | GKEQGPTRGH -GRGHEKQIKH GHKYKHQDG YGHNRRGHGLG HGHQKQHGGLG HGGQRELDLFDL      |
| Siberian Tiger     | GKEQGPTRGH -GWGHEKQIKH GFGHGKHKE HDQGRHNRG RGLGHGHQKQ HGFAGHGKQKH GFGHGHHQ |
| Grizzly Bear       | GKEQGPTRGH -GWGHEKQIKH GFGHGKHKE HDQGRGYHGG RGLGHGYQKQ HGLGHGHQREH         |
| Hippopotamus       | GKEQGNRGRH -GWGHEKQIKH GLGHGKHXX XXXXXXXXXXX XXXXXXXXXXX XXXXXXXXXXX       |
| BN Dolphin         | GKEQGPTRRH -GWGHEKQIKH GLGHGKHKE HDQGHGHQKG HDLGHGHQRG HGHQGGHGLAH         |
| Opossum            | GK-AGYP--H -DHGHWQRGR HPVHGTKNH PGSGLGKHHG HNHSRHRHG HDLG-----             |
| Koala              | GKEQGLTRSF -GPGH--QKEH NSGHGKH-- -----DHRG LGLGHKHEHA H-----               |
| Wombat             | GKEKGLIR-- ----- SFGHGRKE HSSGHGKDH PGLGLGHK---HGH-----                    |
| Platypus           | GKRRGHPLGH -DSCRGRPGQ GRGRGCKRA RD-----                                    |
| Kiwi               | QTPSTETR-- ----- KDHHGPEGE GEPGCKHRHK HGCKHGHGFKK                          |
| Pigeon             | KDGGQEPE-- ----- GEGEPE HKHGHKHEHK HGHKHEKHE HKHEKDHKPKDK                  |
| W-T Tropicbird     | KDGGQEPEGK GEPEKHRLMX GRKRRHYI KDHESDKRHR HEIGCGHRTG YGHGKHKHKN            |
| Alligator          | DGQDGDGCDHR VGHGNGHGHGQ GHRFNHKGPG HGRGRGRGHD IGRGHKHKQK KDKHKDSK          |
| Green Sea Turtle   | DIRHEPA-HK QGHRHDIGHG EHDHRRGHE DEHGCRHDIG HEPEHEHRRG HGHKDEHRCRH          |
| E Brown Snake      | LSFPCSSEAQ RSFSH                                                           |
| Anolis Lizard      | DADKHDESLP TASTSNPLKLA MEVFILLVL SVGLCQAGPV QDDVSCDDPE XVFEAVARAIT         |
| Xenopus leavis     |                                                                            |
| Xenopus tropicalis |                                                                            |
| Nanorana parkeri   |                                                                            |
| Coelacanth         | -KEEKE---- ---TELRRT- -----DD KPHGHERGRG RGRGQEHGR GPGHEH----              |
| Zebrafish          |                                                                            |
| Pufferfish         |                                                                            |
| Elephant Shark     |                                                                            |

Supplemental Figure 7. High Molecular Weight Kininogens (continued).

|                    | 462        |                  | 503               |                                     |
|--------------------|------------|------------------|-------------------|-------------------------------------|
| Human              | DDdleHQGGH | VLDHGhkKkH       | GHGhgKkKkNG       | KK-- NGKHNGWK                       |
| Dog                | EHQRRHGLGH | GHQRGHGLAH       | GhkyEHghGHE       | KY-- KNKRKDNG                       |
| Siberian Tiger     | QHQRHGLGH  | GHQRGRGLAH       | GHTHEHGHGHG       | KY-- KNKRKDNE                       |
| Grizzly Bear       | -----      | -----GLAH        | GHIREHQGHG        | KY-- KNKRKDNG                       |
| Hippopotamus       | XXXXXXXXXX | XXXXXXXXXX       | XXXXXXXXXXXX      | XX--XXXXXXXX                        |
| BN Dolphin         | -----      | --GHKHGhGH       | GKHKNRGKNG        | KH--DGWRTEYL                        |
| Opossum            | -----      | ---QGNKkKH       | GQGHwKHEKkP       | KK---NRK--SWM                       |
| Koala              | -----      | SQ GHGHRhKkKH    | GEGHRKHEKkG       | KK---SP--GSWT                       |
| Wombat             | -----      | AHSQ KHGHRhKkPKH | GEGHQKHEKkD       | KK---S--HGSWT                       |
| Platypus           | -----      | ---HERSPECD      | RGQgKHRnKDR       | PR---GKPNgGK-                       |
| Kiwi               | DHASDKRRHQ | G--IDCGHRT       | GHGCGhQKkSK       | HGKHKHPNPKSSE                       |
| Pigeon             | RHRHEIGCGH | KTGHKCGHkK       | HSKNG--KHPN       | PESSEESDERVFN                       |
| W-T Tropicbird     | GKRKYPNPKP | SDESDErGFN       | QNKTIpSASAE       | TDKRRHrHEIGCGH                      |
| Alligator          |            |                  |                   |                                     |
| Green Sea Turtle   | DIGCGSEHE  | TkhGRGHGHGK      | HRIKDKCKkHS-      | TEESSEESHDKVT                       |
| E Brown Snake      | AYVDNANTL  | VHTQqDCQvQV      | EEKVGPPVHL        | CPGCPVEI                            |
| Anolis Lizard      |            |                  |                   |                                     |
| Xenopus leavis     | RR-DTERA-- | -----            | KG-- PAHGnKGEQkH  | VKkHKKEK---KD                       |
| Xenopus tropicalis | NRIDTERA   |                  | KRHA HGhGHKKEEQkH | GRKHKKERKDKKD                       |
| Nanorana parkeri   |            |                  | LQqH TKGnKGQhKkG  | RKQEQKGSdKKR                        |
| Coelacanth         | -----      | ---GHGhKEKK      | IhGHKQhGDdS       | SE--EHHSHE                          |
| Zebrafish          |            |                  |                   |                                     |
| Pufferfish         |            |                  |                   |                                     |
| Elephant Shark     |            |                  |                   |                                     |
|                    |            | 519              |                   |                                     |
| Human              | -----      | -QTQEKTEGP       | TPI--P-----       | --SLAKP-GVtVtFSDFQdSDLI--ATMPP      |
| Dog                | ----STSSA  | -QTQEKtQGP       | TTL--P-----       | --SLAQp-GIAVtMPDFQdSDLF--AAVMPN     |
| Siberian Tiger     | ----STSSA  | -QTQEKTEGP       | TPL--P-----       | --PLAQp-GIAVtLPDFQdSDLI--AAVMSN     |
| Grizzly Bear       | ----STSSA  | -QTQEKTEGP       | TPL-L-----        | --SLAQp-GIAVtVPDFQdPDLI--AAVN--     |
| Hippopotamus       |            |                  |                   | --SLAQp-GVtVtSPDFQdSDLI--AT         |
| BN Dolphin         | -----      | -QVQKkIEGP       | TPF--P-----       | --SLAQp-SVANTFPnLQdSDLV--ATVMPN     |
| Opossum            | -----      | -PMQEETQGP       | PPP--Q-----       | --SPSQq-GVDVtPSYFQDFdLLDPNPTNIP     |
| Koala              | -----      | ---QEETQGP       | PpLLSSALQEVT      | IT-PSDF-QDLDLLDLNPTNPPSEPktDEKT     |
| Wombat             | -----      | ---QEETQGP       | PpLLSSSLQEVT      | IT-PSDF-QDLDLLDLNPTSPpSEPttKEK      |
| Platypus           | -----      | IDPEEPGTPP       | SILRPTHQPRP       | EGAVtLSYFRdSDLLSPDtPLALP-----       |
| Kiwi               | -----      | --NAEMVSE-       | -----LVTPGA       | VR-----                             |
| Pigeon             | KKTSSPAECG | HKKHskNGkH       | PNPESSEESDE       | rVFNQDEtSPSStDEtAS--PEAAV-----      |
| W-T Tropicbird     | GKRKYPNPKP | SDESDErGFN       | QNKTIpSASAE       | TASELVNPGVARKktStSAEPLILPDISLfnGLPD |
| Alligator          | DKSSEESEK  | VLCERESQLP       | SVDRTSENSQF       | PtTPSLFQSDALtTPGvTVG                |
| Green Sea Turtle   |            |                  |                   | PDLVELD                             |
| E Brown Snake      | QQSALYEVRE | MKTATRQVVN       | GWYNLEYSIK        | ETNCSKNEFLDLtPECRHLPEgKEGFCTVT      |
| Anolis Lizard      |            |                  |                   |                                     |
| Xenopus leavis     | -QEYtILPTV | HATQRMQHTT       | tQtVQLITSAQ       | KQESLSKtPGEQIS                      |
| Xenopus tropicalis | -QEHTILLtQ | HTTAQtVELI       | tSt--LTPHSI       | -----S-TPGGQTP                      |
| Nanorana parkeri   | -DERG      |                  |                   |                                     |
| Coelacanth         | IPGSGLLPSS | VLIKPPSSGP       | GPVVLPSHPEQ       | IPAPDKPVtS TVEFPSPFD VALVSASL--     |
| Zebrafish          |            |                  |                   |                                     |
| Pufferfish         |            |                  |                   |                                     |
| Elephant Shark     |            |                  |                   |                                     |



Supplemental Figure 7. High Molecular Weight Kininogens (continued).

558

|                    |                                                                                                         |                                         |
|--------------------|---------------------------------------------------------------------------------------------------------|-----------------------------------------|
| Human              | ISPAPIQ-----SDD DWIPDIQIDP NGLSFNPISDF --PD <b>TTSPK</b> CPG                                            | RPWKS <b>SVSEI</b> NPTTQMKES--          |
| Dog                | IPPTATE-----SDD DWIPDIQIKP NSLSFNLI SDF --PE <b>QTS</b> PKCPG                                           | RPWKPVHGM NPTVEVKMN--                   |
| Siberian Tiger     | TPPTPTE-----IDD DWIPDIQIEK NSLSFNLI P DF --PE <b>KT</b> SPKCPG                                          | RPWKPVNGM NPTVEIKEF--                   |
| Grizzly Bear       | NPSAPKE-----SDD DWIPDIQIEP NSLSFNLI P DF --PE <b>KT</b> SPKCPG                                          | RPWKPVNGM NPAVEVKEF--                   |
| Hippopotamus       | LPPPTE-----SDD DLIPDIQIEP NSLPFELI SDF --PE <b>TT</b> SPKCPG                                            | RPWKPINGV NPTVEMKE---                   |
| BN Dolphin         | TLPPPTE-----SDD DLIPDIQIEP NSLAFKLI P DF --PE <b>TT</b> SPKCPG                                          | RPWKPVNGV NPTVEMKEFHD                   |
| Opossum            | VEPTAEQKTGGEEA <b>EEE</b> VLFDPDIPIVP KSPLFTLMPDF PEPEPIVPK <b>CPG</b>                                  | SPWQPITVM NPVTEESQ <b>NED</b>           |
| Koala              | -----KETAGEE <b>EY</b> TDD DWIPDIPIQP KSSLFTLVPDF --PE <b>PP</b> APK <b>CPG</b>                         | RPWKPIDVM DPVKEESQ <b>YMD</b>           |
| Wombat             | -----KEKAGEE <b>ED</b> TDD DWIPDIPVQP KSPLFTLVPDF --PE <b>S</b> APK <b>CPG</b>                          | RPWKPIDAM GPVKEESPYVD                   |
| Platypus           | -----PSD GDLFPEIQSE PKDFSLG <b>LLDF</b> --PE <b>PP</b> PK <b>CPG</b>                                    | RPWKPIQGM DPATEEKQ <b>YDD</b>           |
| Kiwi               | -----QET SIPAETVTLP DIFLVNGLPDR --SE <b>S</b> PLR <b>CPG</b>                                            | KPWKPIDML PVP <b>PS</b> FPRELE          |
| Pigeon             | -----KKT SSPAEP <b>LILP</b> DTSFSNGSPDH --PE <b>S</b> PLP <b>CPG</b>                                    | KPWKQIMDL P <b>AP</b> DSFPREFT          |
| W-T Tropicbird     | ---ASELVNPGVAR <b>KKT</b> STSAEP <b>LILP</b> DISLFNGLPDR --PE <b>S</b> SLR <b>CPG</b>                   | KPWKQIMDL PVP <b>PS</b> LPREFK          |
| Alligator          | ---PRDSSSTPDIP <b>EEP</b> VSPGTAEIAP DISLFDEL <b>PDL</b> --PE <b>PP</b> VSK <b>CPG</b>                  | KPWKSIMQF TNPSENTIL <b>FT</b>           |
| Green Sea Turtle   | VLPSTLTDGVTEIP <b>DLP</b> AEPD <b>SPGIIP</b> DIPLFGGLP <b>DV</b> --PE <b>S</b> VPK <b>CPG</b>           | KPWKPIADL STT <b>TN</b> KPKVLT          |
| E Brown Snake      | ---QEDITAR <b>SPG</b> ESV GFPS <b>PDSIVP</b> SLSL <b>FERLPDL</b> --PE <b>PP</b> APK <b>CPG</b>          | NPWKPIILP PTSL <b>PD</b> PGDFA          |
| Anolis Lizard      | ---QEDITAR <b>SPG</b> ESV GFPS <b>PDSIVP</b> SLSL <b>FERLPDL</b> --PE <b>PP</b> APK <b>CPG</b>          | NPWKPIILP PTSL <b>PD</b> PGDFA          |
| Xenopus leavis     | KTTEKPTLGLFPHI <b>PSV</b> QEDQDN <b>FFNF</b> HNAEPDL <b>PGP</b> --D <b>S</b> SN <b>F</b> PK <b>CPG</b>  | KPWE <b>P</b> VKLP STEPT <b>Y</b> DLFDL |
| Xenopus tropicalis | ETTEEPTLGLFPQI <b>PSV</b> PEDQDN <b>FFNF</b> HDNVEPDL <b>PGP</b> --E <b>S</b> DN <b>L</b> PK <b>CPG</b> | NPWE <b>P</b> VKLP I <b>TE</b> PVYNPFDL |
| Nanorana parkeri   | INVNMKEDSHQVLD <b>LPS</b> AQ <b>TPV</b> SKEA VPKDIEEK <b>SNL</b> --E <b>L</b> PV <b>V</b> PK <b>CPG</b> | KLWQ <b>PR</b> SLT TTV <b>K</b> TFTDDDL |
| Coelacanth         | -----PSF PDVALVSASL PDLHKET <b>FPDL</b> --PE <b>G</b> PEI <b>K</b> CPG                                  | QPWK <b>PI</b> SPL HGV <b>T</b> SEFSHT  |
| Zebrafish          |                                                                                                         |                                         |
| Pufferfish         |                                                                                                         |                                         |
| Elephant Shark     |                                                                                                         |                                         |

|                    |                                                                                                                |                 |  |
|--------------------|----------------------------------------------------------------------------------------------------------------|-----------------|--|
|                    | 617                                                                                                            | 626             |  |
| Human              |                                                                                                                | YYFDLTDGLS----- |  |
| Dog                | PTVEVKEFHDFDLSDALY                                                                                             |                 |  |
| Siberian Tiger     | EIKEFHDFDLSDALY                                                                                                |                 |  |
| Grizzly Bear       | PDFDLTDALY                                                                                                     |                 |  |
| Hippopotamus       |                                                                                                                |                 |  |
| BN Dolphin         | FSLSDALY                                                                                                       |                 |  |
| Opossum            | FELSDALSFGKK                                                                                                   |                 |  |
| Koala              | FDLSDALEFGKK                                                                                                   |                 |  |
| Wombat             | FDLSDALEFGKK                                                                                                   |                 |  |
| Platypus           | FDLFDAVR                                                                                                       |                 |  |
| Kiwi               | DLLPSAVENINPTTENS <b>NPTQNEETS</b> FELSDALQ                                                                    |                 |  |
| Pigeon             | DEDLLVFS <b>LKNNDPATES</b> STSP--QTKDL <b>DL</b> SDALL                                                         |                 |  |
| W-T Tropicbird     | NEDLLTSV <b>KENVNPD</b> TENSTPP--QNKDF <b>LL</b> DALL                                                          |                 |  |
| Alligator          | NEDLLPN <b>PLEN</b> LN <b>PASEK</b> PSINTDVGF <b>DLVD</b> ALPL                                                 |                 |  |
| Green Sea Turtle   | NEDLLPH <b>LSE</b> DTNP <b>ETE</b> KYTLPPQ <b>DLDD</b> FN <b>LM</b> D <b>SLL</b>                               |                 |  |
| E Brown Snake      | ATD <b>SP</b> ELQ <b>EPLQNI</b> IES <b>FN</b> ANN <b>SGDF</b> HFRIVE <b>IK</b> DAT <b>KQV</b>                  |                 |  |
| Anolis Lizard      | LEDLL <b>P</b> SEGD <b>VVE</b> PKEISAVAI <b>Q</b> PVAAD <b>FDL</b> ADALY                                       |                 |  |
| Xenopus leavis     | ASAIGDATPTVAENIEN <b>KVPG</b> ST <b>SQ</b> --FNDED <b>LL</b> S <b>FI</b>                                       |                 |  |
| Xenopus tropicalis | AFAIED <b>TTTTTT</b> TANENI <b>KNKE</b> PG <b>SQ</b> Q <b>PF</b> NDED <b>LL</b> S <b>LI</b>                    |                 |  |
| Nanorana parkeri   | AFAAAD <b>F</b> K <b>PLPE</b> KEE <b>EPSKPY</b> TP <b>KI</b> - <b>PF</b> FDDED <b>LL</b>                       |                 |  |
| Coelacanth         | SSAYEEK <b>SMV</b> GGATDFK <b>DTD</b> LL <b>GF</b>                                                             |                 |  |
| Zebrafish          |                                                                                                                |                 |  |
| Pufferfish         | PWKVFN <b>PPSPV</b> APT <b>DAP</b> NMT <b>ADAP</b> VLS <b>DT</b> DL <b>LA</b>                                  |                 |  |
| Elephant Shark     | RHIT <b>PTDP</b> V <b>SETV</b> PP <b>PLN</b> T <b>AEE</b> GE <b>QPK</b> SD <b>G</b> FF <b>FD</b> LL <b>AGL</b> |                 |  |

## Supplemental Figure 8. Comparison of Human Factor XII and Human Pro-HGFA

Blue Highlight indicates residues of the catalytic triad

Residue 353 is the arginine immediately preceding the activation cleavage site of Factor XII.

\*Amino acid numbering is for human factor XII

|            |                                        |                                                     |                                       |                                       |                                       |                                       |                                       |
|------------|----------------------------------------|-----------------------------------------------------|---------------------------------------|---------------------------------------|---------------------------------------|---------------------------------------|---------------------------------------|
| Factor XII | -----                                  | -----                                               | -----                                 | -----                                 | -----                                 |                                       |                                       |
| Pro-HGFA   | QPGGN                                  | RTESPEPNAT                                          | ATPAIPTILV                            | TSVTSETPAT                            | SAPEAEGPQS                            |                                       |                                       |
| Factor XII | *1                                     |                                                     |                                       |                                       |                                       |                                       |                                       |
| Pro-HGFA   | IPPWEAPKEH                             | KYKAEHTTVV                                          | LTVTGEPC <sup>H</sup> HF              | PFQYHRQLYH                            | K <sup>C</sup> THKGRPGP               | QPWC <sup>C</sup> ATTPNF              | DQDQRWGY <sup>C</sup> L               |
|            | GGLPPPPRAV                             | PSSSSPQAQA                                          | LTEDGRPC <sup>R</sup> RF              | PFQYGRMLH                             | ACTSEGS <sup>A</sup> HR               | K-W <sup>C</sup> ATTHNY               | DRDRAWGY <sup>C</sup> CV              |
| Factor XII | 71                                     |                                                     |                                       |                                       |                                       |                                       |                                       |
| Pro-HGFA   | E--PKKVK--                             | --DH <sup>C</sup> SKHSP                             | C <sup>C</sup> QKGGT <sup>C</sup> VNM | PSGPH-- <sup>C</sup> CLC              | PQHLTGNHC <sup>C</sup> Q              | KEK <sup>C</sup> CFEPQLL              | RFHKNEIYW                             |
|            | EATPPPGGPA                             | ALDPC <sup>C</sup> ASG-P                            | CLNGGS <sup>C</sup> SNT               | QDPQSYHC <sup>C</sup> SC              | PRAFTGKDC <sup>C</sup> G              | TEK <sup>C</sup> CFDETRY              | EYLEGGDRWA                            |
| Factor XII | 133                                    |                                                     |                                       |                                       |                                       |                                       |                                       |
| Pro-HGFA   | RTEQA <sup>A</sup> VAR <sup>C</sup>    | Q <sup>C</sup> CKGPD <sup>A</sup> HC <sup>C</sup> Q | RLASQA <sup>C</sup> RTN               | P <sup>C</sup> CLHGGR <sup>C</sup> LE | VEGHRL-- <sup>C</sup> CH              | CPVGYTGAF <sup>C</sup> C              | DVDTKAS <sup>C</sup> CYD              |
|            | RVRQGHVE <sup>C</sup> Q                | EC <sup>C</sup> FGGR <sup>T</sup> W <sup>C</sup> CE | GTRHTA <sup>C</sup> LSS               | P <sup>C</sup> CLNGGT <sup>C</sup> HL | IVATGTTV <sup>C</sup> CA              | CPPGFAGRL <sup>C</sup> C              | NIEPDER <sup>C</sup> CFL              |
| Factor XII | 201                                    |                                                     |                                       |                                       |                                       |                                       |                                       |
| Pro-HGFA   | GRGLSYRGLA                             | RTTSLGAP <sup>C</sup> Q                             | PWASEATYRN                            | VTAEQ--ARN                            | W-GLGGHAF <sup>C</sup> C              | RNPNDIRPW                             | C <sup>C</sup> FVLNRDRLS              |
|            | GNGTGYRGVA                             | STSASGLS <sup>C</sup> CL                            | AWNSDLLYQE                            | LHVDSVGAAA                            | LLGLGPHAY <sup>C</sup> C              | RNPNDIRPW                             | C <sup>C</sup> YVVKDSALS              |
| Factor XII | 268                                    |                                                     |                                       |                                       |                                       |                                       |                                       |
| Pro-HGFA   | WEY <sup>C</sup> CDLAQ <sup>C</sup> CQ | TPTQAAPPTP                                          | VSPRLHVPLM                            | PAQPAPPKPO                            | PTTRTPPQSO                            | TPGALPAKRE                            | QPPSLTRNGP                            |
|            | WEY <sup>C</sup> CRLEA <sup>C</sup> CE | SLTRVQLSPD                                          | LLATLPEPAS                            | PGRQA-----                            | -----                                 | -----                                 | -----                                 |
| Factor XII | 338                                    | 353                                                 |                                       |                                       | 393                                   |                                       |                                       |
| Pro-HGFA   | LS <sup>C</sup> GQRLRKS                | LSSMT <sup>R</sup> VVGG                             | LVALRGAHPY                            | IAALYWGHSF                            | C <sup>C</sup> AGSLIAP <sup>C</sup> W | VLTA <sup>A</sup> H <sup>C</sup> CLQD | RPAPEDLTVV                            |
|            | -- <sup>C</sup> GRRHKKR                | TFLRP <sup>R</sup> IIGG                             | SSSLPGSHPW                            | LAAIYIGDSF                            | C <sup>C</sup> AGSLVHT <sup>C</sup> W | VVSA <sup>A</sup> H <sup>C</sup> CFSH | SPPRDSVSVV                            |
| Factor XII | 408                                    |                                                     |                                       | 442                                   |                                       |                                       |                                       |
| Pro-HGFA   | LGQERRNHS <sup>C</sup>                 | EPC <sup>C</sup> QTLAVRS                            | YRLHEAFSPV                            | SYQH <sup>D</sup> LALLR               | LQEDADGSC <sup>A</sup>                | LLSPYVQPV <sup>C</sup> C              | LPSGAARPSE                            |
|            | LGQHFFNR <sup>T</sup> T                | DVTQT <sup>T</sup> FGIEK                            | YIPYTLYSVF                            | NPSDH <sup>D</sup> LVLI               | RLKKKGDR <sup>C</sup> CA              | TRSQFVQPI <sup>C</sup> C              | LPEPGSTFPA                            |
| Factor XII | 478                                    |                                                     |                                       |                                       |                                       | 544                                   |                                       |
| Pro-HGFA   | TTL <sup>C</sup> CQVAGWG               | HQFEGAE <sup>E</sup> YA                             | SFLQEAQVPF                            | LSLER <sup>C</sup> SAPD               | VHGSSILPGM                            | L <sup>C</sup> CAGFLEGGT              | DA <sup>C</sup> CQGD <sup>S</sup> GGP |
|            | GHK <sup>C</sup> CQIAGWG               | HLDEN <sup>V</sup> SGYS                             | SSLREALVPL                            | VADHK <sup>C</sup> SSPE               | VYGADISPNM                            | L <sup>C</sup> CAGYFDCKS              | DA <sup>C</sup> CQGD <sup>S</sup> GGP |
| Factor XII | 548                                    |                                                     |                                       | 596                                   |                                       |                                       |                                       |
| Pro-HGFA   | LV <sup>C</sup> EDQAAER                | RLTLQGIISW                                          | GSG <sup>C</sup> CGRNKP               | GVYTDVAYYL                            | AWIREHTVS                             |                                       |                                       |
|            | LACEKNGVAY                             | ---LYGIISW                                          | GDG <sup>C</sup> CGR <sup>L</sup> HKP | GVYTRVANYV                            | DWINDRIRPPRR                          | LVAPS                                 |                                       |



**Supplemental Figure 10. Prekallikrein Activation by Factor XIIa and Hepatocyte Growth Factor Activator.**

**Western blots (top row).** PK (200nM) was incubated at 37°C with vehicle, or with 25nM HGFA or fXIIa, in the presence of 10 µg/ml dextran sulfate (500 kDa). Aliquots were removed at various times into reducing SDS-sample buffer, size-fractionated by SDS-PAGE, and transferred to nitrocellulose. Western blots were developed with HRP-conjugated goat anti-human PK IgG. Markers at the left of each image show the locations of standard for PK and the heavy chain (HC) and light chain (LC) of PKa. Positions of molecular weight standards for the left and center panels are shown on the left of the image. The image on the right is of a gel that was run at a different time from gels in the other two panels.

**Chromogenic assay (bottom row).** Cleavage of the chromogenic substrate S-2302 (0.5 mM) by products from reactions similar to those in the western blots were followed by recording changes in  $\Delta$ OD405 nm on a microplate spectrophotometer.

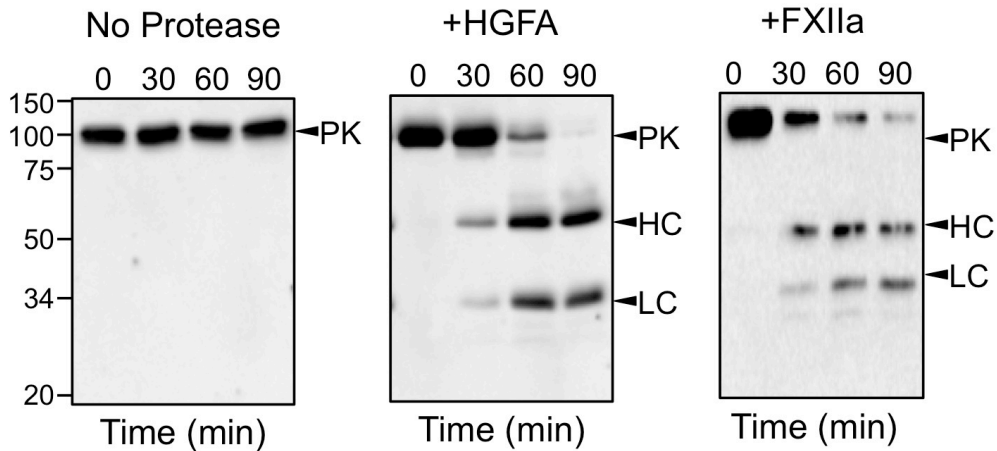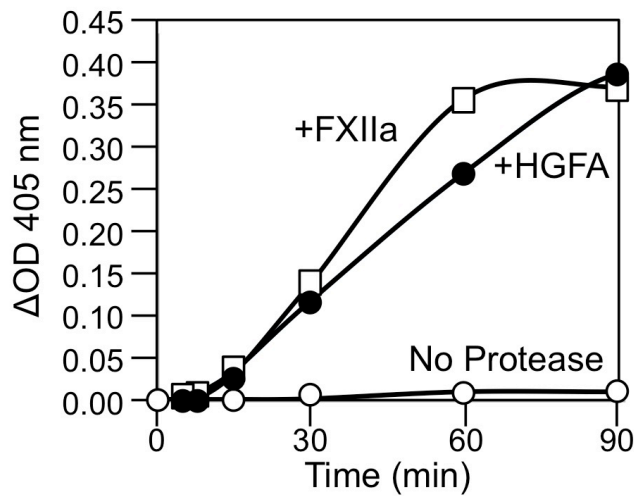

## Supplemental Figure 11. Comparison of Human Prekallikrein and Factor XI

Blue Highlight indicates residues of the catalytic triad

Residues indicate sequence required to form the factor IX-binding exosite.

Residue 369 is the arginine immediately preceding the activation cleavage site in human FXI.

\*Amino Acid numbering is for human factor XI

\*1  
 Prekallikrein G<sup>1</sup>LTQLYENA FFRGGDVASM YTPNAQY<sup>1</sup>COM R<sup>1</sup>CTFHPR<sup>1</sup>CLL FSFLPASSIN DMEKRF<sup>1</sup>G<sup>1</sup>FL KDSVTGTLPK  
 Factor XI E<sup>1</sup>CVTQLLKDT <sup>1</sup>CFEGGDITTV FTPSAKY<sup>1</sup>CQV V<sup>1</sup>CTYHPR<sup>1</sup>CLL FTFTAESPSE DPTRWFT<sup>1</sup>VL KDSVTETLPR

71  
 Prekallikrein V<sup>71</sup>HRTGAVSGH SLK<sup>71</sup>Q<sup>71</sup>CGHQIS A<sup>71</sup>CHRDIYKGV DMRGVNFNVS KVSSVEE<sup>71</sup>C<sup>71</sup>QK R<sup>71</sup>CTNNIR<sup>71</sup>C<sup>71</sup>QF FSYATQTFHK  
 Factor XI VNRTAAISGY S<sup>71</sup>FK<sup>71</sup>Q<sup>71</sup>CSHQIS A<sup>71</sup>CNKDIYVDL DMKGINYNSS VAKSAQE<sup>71</sup>C<sup>71</sup>QE R<sup>71</sup>CTDDVH<sup>71</sup>C<sup>71</sup>HF FTYATRQFPS

141  
 Prekallikrein AEYRNN<sup>141</sup>CLLK YSPGGTPTAI KVLSNVESGF SLKPC<sup>141</sup>ALSEI G<sup>141</sup>CHMNIFQHL AFSDVDVARV LTPDAFV<sup>141</sup>CR<sup>141</sup>T  
 Factor XI LEHRNIC<sup>141</sup>LLK HTQTGTPTRI TKLDKVVSGF SLKSCALS<sup>141</sup>NL A<sup>141</sup>CT<sup>141</sup>RDIFPNT <sup>141</sup>VFADSNIDS<sup>141</sup>V MAPDAFV<sup>141</sup>CGR

211  
 Prekallikrein I<sup>211</sup>CTYHPNCLF FTFYTNVWKI ESQRNV<sup>211</sup>CLLK TSESGTPSSS TPQENTISGY SLLT<sup>211</sup>CKR<sup>211</sup>TL<sup>211</sup>P EP<sup>211</sup>CHSKIYPG  
 Factor XI I<sup>211</sup>CTHHPGCLF FTFFSQEWPK ESQRNL<sup>211</sup>CLLK TSESGLPSTR IKKSKALSGF SLQS<sup>211</sup>CRHSIP VF<sup>211</sup>CHSSFYHD

281 321 326  
 Prekallikrein VDFGGEELNV TFVKGVNV<sup>281</sup>C<sup>281</sup>Q ET<sup>281</sup>CTKMIR<sup>281</sup>C<sup>281</sup>Q FFTYSLLPED C<sup>321</sup>KEEK<sup>321</sup>C<sup>326</sup>FL RLSMDGSPTR IAYGTQGSSG  
 Factor XI TDFLGEELDI VAAKSHEA<sup>281</sup>C<sup>281</sup>Q KL<sup>281</sup>CTNAVR<sup>281</sup>C<sup>281</sup>Q FFTYTPAQAS C<sup>321</sup>NEGK<sup>326</sup>GK<sup>326</sup>C<sup>326</sup>YL KLSNNGSPTK ILHGRGGISG

351 371 415  
 Prekallikrein YSLRL<sup>351</sup>CNTGD NSV<sup>371</sup>CTTKTST R<sup>371</sup>IVGGTNSW GEWPQVSLQ VKLTAQRHLC GGSLIGHQWV L<sup>415</sup>TAAH<sup>415</sup>CFDGL  
 Factor XI YTLRL<sup>351</sup>CKMD- -NE<sup>371</sup>CTTKIKP R<sup>371</sup>IVGGTASVR GEWPQVTLH TTSPTQRHLC GGSIIIGNQWI L<sup>415</sup>TAAH<sup>415</sup>CFYGV

421 464  
 Prekallikrein PLQDVWRIYS GILNLS<sup>421</sup>DITK DTPFSQIKEI I<sup>464</sup>IHQNYKVSE GNH<sup>464</sup>DIALIKL QAPLNYTEFQ KPI<sup>464</sup>CLPSKGD  
 Factor XI ESPKILRVYS GILNQSEIKE DTSFFGVQEI I<sup>464</sup>IHDQYKMAE SGY<sup>464</sup>DIALLKL ETTVNYTDSQ RPI<sup>464</sup>CLPSKGD

491 559  
 Prekallikrein TSTIYTNC<sup>491</sup>WV TGWGF<sup>559</sup>SKEKG EIQNILQKVN IPLVTNEE<sup>491</sup>C<sup>559</sup>Q KRYQDYKITQ RMV<sup>559</sup>CAGYKEG GKDA<sup>559</sup>CKGDSG  
 Factor XI RNVIYTDC<sup>491</sup>WV TGWGYRKL<sup>559</sup>RD KIQNTLQKAK IPLVTNEE<sup>491</sup>C<sup>559</sup>Q KRYRGHKITH KMI<sup>559</sup>CAGYREG GKDA<sup>559</sup>CKGDSG

561 619  
 Prekallikrein GPLV<sup>561</sup>CKHNGM WRLVGITSWG EGC<sup>619</sup>ARREQPG VYTKVAEYMD WILEKTQSSD GKAQM<sup>619</sup>QSPA  
 Factor XI GPLS<sup>561</sup>CKHNEV WHLVGITSWG EGC<sup>619</sup>AQRERPG VYTNVVEYVD WILEKTQAV

## Supplemental Figure 12. Comparison of Human and Platypus Prekallikrein.

H-Prekallikrein - human prekallikrein  
 P-Prekallikrein - platypus prekallikrein

**Blue Highlight** indicates residues of the catalytic triad  
**Residue 371** is the arginine immediately preceding the activation cleavage site in human PK.  
 \*Amino Acid numbering is for human prekallikrein.

```

*1
H-Prekallikrein  GCLTQLYENA FFRGGDVASM YTPNAQYQOM RCTFHPRCLL FSFLPASSIN DMEKRFGCFL KDSVTGTLPK
P-Prekallikrein  DCVTRLQEDI FFKGGDLAAF FAPSADHCR LCTFHPRCLL FSFLPAHTLQ DESRWFRCYL KDSVTETLPR

71
H-Prekallikrein  VHRTGAVSGH SLKQCGHQIS ACHRDIYKGV DMRGVNFNVS KVSSVEECOK RCTNNIRCQF FSYATQTFHK
P-Prekallikrein  VTVAGAVSGH SFKHCGHLIS LCSREVVHPLG DMRGTNHNRS WARSEDECQR RCTDDARCQF FTFATQRFHS

141
H-Prekallikrein  AEYRNNCLLK YSPGGTPTAI KVLNVESEGF SLKPCALSEI GCHMNIFQHL AFSDVDVARV LTPDAFVCRT
P-Prekallikrein  AANRNACLLK HSSTGTPTTI KMDGVVSGF SLKACALSHL GCTRDIQDM AFSDDDVAKM VTPDAFVCQT

211
H-Prekallikrein  ICTYHPNCLF FTFYTNVWKI ESQRNVCLLK TSESGTPSSS TPQENTISGY SLLTCRKRTLPEPCHSKIYPG
P-Prekallikrein  ACTYHPSCLF FTFHTNAWTP EAQRNICLLK TSQSGSPSSS LPTPHAVSGY SLLACQGPLP ETCHRKVYPG

281
H-Prekallikrein  VDFGGEELNV TFVKGVNVCQ ETCTKMIRCQ FFTYSLLPED CKEEKCKCFL RLSMDGSPTR IAYGTQGSSG
P-Prekallikrein  MAFEGDKLRQ VLVSGVDACQ KNCTDTRLRQ FFTYASLPTE CQGDRCCECSL MMSDGDGAPSK VVPGVGRASG

351
H-Prekallikrein  YSLRLCNTGD NSVCTTKTST RIVGGTNSSW GEWPWQVSLQ VKLTAQRHLG GGSLLIGHQWV LTAARCFDGL
P-Prekallikrein  YSLRLCRTGV GPVCSKTNTV RVVGGTKSAP GEWPWQVSLH VKKSTQHLLC GGSIIIGPRWI LTAARCFDGL

421
H-Prekallikrein  PLQDVWRIYS GILNLSDITK DTPFSQIKEI IIHQNYKVSE GNHDIALIKL QAPLNYTEFQ KPTCLPSKGD
P-Prekallikrein  NLPALWRVYG GILNQSTIDE NTPFSRVQEI IIHSQYKVLN SGHDIALMKL ESPLNFTDLQ RPTCLPTPED

491
H-Prekallikrein  TSTIYTNQWV TGWGFSEKEG EIQNILQKVN IPLVTNEECQ KRYQDYKITQ RMVQAGYKEG GKDACKGDSSG
P-Prekallikrein  TGVTLANQWV TGWGSRENG EVQAILQKAK IPVISNLEECQ ERYPQHKVTS GMVQAGYKDG GKDACKGDSSG

561
H-Prekallikrein  GPLVCKHNGM WRLVGITSWG EGCARREQPG VYTKVAEYMD WILEKTQSSD GKAQMOSPA
P-Prekallikrein  GPLACKHHGV WHLTGVTSWG EGCARKDHPG VYTRVAEYVA WIQENTQTRD EPASPELPT
  
```

## Supplemental Figure 13. Comparison of Human and Monotreme Factor XI.

H-Factor XI - human factor XI  
P-Factor XI - platypus factor XI  
E-Factor XI - echidna factor XI

Blue Highlight indicates residues of the catalytic triad

Residues required for forming the factor IX-binding exosite

Residue 369 is the arginine immediately preceding the activation cleavage site in human FXI.

X indicates missing sequence

\*Amino Acid numbering is for human factor XI

\*1  
H-Factor XI ECVTQLLKDT CFEGGDITTV FTPSAKYCOV VCTYHPRCLL FTFTAESPSE DPTRWFTCVL KDSVTETLPR  
P-Factor XI ECMTRMYNDT YFQGGYLRTV FSPNVQHCQL VCTLHPRCLL FSFLPGRLTP DPAKRFAFL K DSESEMLPK  
E-Factor XI ECVTQIYNDT YFQGGDLRTV FSPNVQHCQL TCTLHPRCLL FSFLPGRLTP XXXXXXXXXXXX KDSKSETLPK

71  
H-Factor XI VNR TAAISGY SFKQCSHQIS -ACNKDIYVD LDMKGINYNS SVAKSAQECQ ERCTDDVHCH FFTYATRQFP  
P-Factor XI VT VAGAVSGH SWKQCHHHIT -ACLKDVFPG LDMRGTNHDA GPAQNWRECQ ARCTNDAHCH FFTFATSAPH  
E-Factor XI VT IAGAVSGH SWKQCRHHIS GACVKDVFPG LDMRGNNH DG GPAQSWQECQ AXXXXXXXXX XXXXXXXXXXXX

140  
H-Factor XI SLEHRNICLL KHTQTGTPTR ITKLDKVVSG FSLKSCALSN LACIRDIFPN TVFADSNIDS VMAPDAFVCG  
P-Factor XI STAHRNTCLL KHSATGAPTS ITILEHVL SG FSLKPCALSK MACLRDIFSE TAFADNDTAR AVAPDAFVCR  
E-Factor XI XXXRNTCLL KHSATGAPTS ITILEHVL SG FSLKPCGLSK XACLRDIFSE TAFADNETAR AVAPDAFVCR

210  
H-Factor XI RICTHHPGCL FFTFFSQEWP KESQRNLCCL KTSESGLPST RIKKSKALSG FSLQSCRHSI PVFCHSSFYH  
P-Factor XI NLCTHHPSCCL FFTFY SQEWP DPSQRNLCCL KSSASGIPTS RLSRERAYSG FSLRSCRHGV PIFCHPSLYS  
E-Factor XI GLCTHHPACL FFTFY SQEWP DPSQRNLCCL KSSASGIPTA RLSRERAYSG RSLRSCRHGV PXXXXXXXXX

280 321  
H-Factor XI DTDFLGEELD IVAAKSHEAC QKLC TNAVRC QFFTYTPAQA SCNEGKGCY LKLSSNGSPT KILHGRGGIS  
P-Factor XI DTDFLGEELD VAYANGPAAC QKLC TDVARC QFFTHSPLHQ ADNPRRGKCS LKMSSNGSPS KIVYGRGGIS  
E-Factor XI XTDFLGSELD VAYANGPAAC QKLC TDVDR C PFGIASACSR LQSPRRGKCS LKMSSDGS PS KIVYGRGGIS  
E-FXI Var ADNPRGRKC

350 369 413  
H-Factor XI GYTLRLCKMD NECTTKIKPR IVGGTASVRG EWPWQVTLHT TSPTQRHL CG G--SIIGNQW ILTAAHCFY G  
P-Factor XI GYTLRLCQMD NVCMTKIRSR VVG G VRSARG EWPWQVSLQV VQPRQKHL CG G--SIIGDSW ILTAAHCLDR  
E-Factor XI GYTLRLCQMD NXCMTKIRSR VVG GEGSVRG EWPWQVSLQV VQPRQRHL CG GGESIIGNSW VLTAAHCFSR

418 462  
H-Factor XI VESPKILRVY SGILNQSEIK EDTSFFGVQE I I IHDQYKMA ESGYDIALLK LETTVNYTDS QRPICLPSKG  
P-Factor XI VVTLEELRVY AGFLNQSEIR QGTFPSRVQK A I IHRQYQSA EFGFDIALLK LAAPISFTDI QRPICLPPEG  
E-Factor XI LNLPALWRVY GGILNQSTID ENTFFPSRVQE I I IHSQYKVL NSGHDIALMQ LESPLNFTGR QRPICLPPEG

488 557  
H-Factor XI DRNVIYTD CW VTGWGYRKL R DKIQNTLQKA KIPLVTNEEC QKRYRGHKIT HKMICAGYRE GGDACKGDS  
P-Factor XI DPTLAFSNCW VTGWGYGRED GEIQNTLQKV SVPLVANEEC QAWYNPNRIT DHMVCAGSEE GDRDTCKGDS  
E-Factor XI DPTLAFSNCW VTGWGYGKED GEVQAILQKA KIPVISNLE C QERYPQHKIT GGMVCAGYKD GGDACKGDS

558 607  
H-Factor XI GGPLSCKHNE VWHLVGITSW GEGCAQRERP GYVTNVVEYV DWILEKTQAV  
P-Factor XI GGPLACEDHG VWYLVGITSW GEGCGRRTRP GYVTRVSGFY NWILESTLA  
E-Factor XI GGPLACEDHG VWYLVGVTSW GEGCARRDKP GYVTNVVEYV DWILEKTQ

## Supplemental Figure 14. Comparisons of Factor XI A4 and Activation Cleavage Site Sequences.

Blue Highlight indicates residues of the catalytic triad

Residue 369 is the arginine preceding the activation cleavage site in human factor XI.

P Proline at residue 368 (human numbering system) consistent with thrombin cleavage site.

Residues of the hydrophobic interaction involved in FXI dimerization.

X indicates missing sequence

\*Amino Acid numbering is for human factor XI.

|                   | *273       |         |     |         | 321  | 326     |      |            |    |       |        |             |
|-------------------|------------|---------|-----|---------|------|---------|------|------------|----|-------|--------|-------------|
| Human             | CHSSFYHDTD | FLGEELD | VA  | AKSHEA  | CQKL | CTNAVR  | CQFF | TYTPAQAS   | CN | EG--  | KGKCYL | KLSSNGSPTK  |
| Mouse             | CHPSFYNDTD | FLGEELD | VD  | VKGQET  | CQKT | CTNNAR  | CQFF | TYYPHRLC   | CN | ERNRR | GRCYL  | KLSSNGSPTR  |
| White Foot Mouse  | CHPSFYNDTD | FLGEELD | VD  | VRGHET  | CQKM | CTDAIRC | CQFF | TYSPSRGS   | CN | EGNHR | GRCYL  | KLSPNGSPTR  |
| Deer Mouse        | CHPSFYNDTD | FLGEELD | VD  | VKGHET  | CQKM | CTDAIRC | CQFF | TYSPSRGS   | CN | EG--  | KGKCYL | KLSPNGSPTR  |
| Rabbit            | CHSSFYDSTD | FLGEELD | VD  | VKGHEA  | CQKM | CTSAIRC | CQFF | TYSSSQESH  | N  | KG--  | KGTCYL | KLSSNGSPTK  |
| Dog               | CHSSFYHNTD | FLGEELD | VD  | VKGHEA  | CQKM | CTDAIRC | CQFF | TYSPSPESC  | H  | GG--  | KGKCYL | KLSSNGSPTK  |
| Red Fox           | CHSSFYHNTD | FLGEELD | VD  | AKGHEA  | CQKM | CTDAIRC | CQFF | TYSPSLES   | C  | GG--  | KGKCYL | KLSSNGSPTK  |
| Horse             | CHPSFYHDTD | FLGEELD | VD  | MKGHEA  | CQKM | CTDTSRC | CQFF | TYSPPHESC  | N  | GG--  | KGKCYL | KLSSNGSPTK  |
| Prezwalksi Horse  | CHPSFYHDTD | FLGEELD | VD  | MKGHEA  | CQKM | CTDTSRC | CQFF | TYSPPHESC  | N  | GG--  | KGKCYL | KLSSNGSPTK  |
| Yak               | CHSSFYRNTD | FLGEELD | VD  | ADSHEA  | CQKT | CTNSIRC | CQFF | TYSPSQESC  | N  | GG--  | KGKCYL | KLSSANGSPTK |
| Cattle            | CHSSFYRNTD | FLGEELD | VD  | ADSHEA  | CQKT | CTNSIRC | CQFF | TYSPSQESC  | N  | GG--  | KGKCYL | KLSSANGSPTK |
| Giant Panda       | CHSSFYHNTD | FLGEELD | VD  | AKGHED  | CQKM | CTDTIRC | CQFF | TYSPSPESC  | N  | GG--  | KGKCYL | KLSSNGSPTK  |
| Grizzly Bear      | CHSSFYHNTD | FLGEELD | VD  | AKGHED  | CQKM | CTDTIRC | CQFF | TYSPSPESC  | N  | GG--  | KGKCYL | KLSSNGSPTK  |
| Polar Bear        | CHSSFYHNTD | FLGEELD | VD  | AKGHED  | CQKM | CTDTIRC | CQFF | TYSPSPESC  | N  | GG--  | KGKCYL | KLSSNGSPTK  |
| Cheetah           | CHSSFYHNTD | FLGEELD | VD  | VKGHEA  | CQKM | CTDSIRC | CQFF | TYSPSPESC  | N  | GG--  | KGKCYL | KLSSNGSPTK  |
| Dromedary         | CHSSFYHNTD | FLGEELD | VD  | VPGHEA  | CQKA | CTNTIRC | CQFF | TYSPSQESC  | N  | GE--  | GGKCYL | KLSSNGSPTK  |
| Beaver            | CHSSFYHNTD | FLGEELD | VD  | VKGHEV  | CQKL | CTSSIRC | CQFF | TYSQSQESY  | K  | ER--  | KGKCYL | KLSSNGSPTK  |
| Guinea Pig        | CPSSFYRNTD | FLGEELD | VD  | VQGHEA  | CQKM | CTNAIRC | CQFF | TYLPPQESC  | N  | ER--  | KGKCYL | KLSSNGSPTK  |
| Rhinoceros        | CHPSFYRNTD | FLGEELD | VD  | TKGHEA  | CQKM | CTNTVRC | CQFF | TYSPPPQESC | K  | AG--  | KGKCYL | KLSSNGSPTK  |
| Star Nosed Mole   | CHPSFYHSD  | FLGEELD | VD  | VQGHEA  | CQKM | CTNTLRC | CQFF | TYTPSQESC  | N  | GG--  | KGKCYL | KLSSDGSPTK  |
| Chinese Hamster   | CHPSFHNTD  | FLGEELD | VE  | VKDHEA  | CQKM | CTNAVR  | CQFF | TYSPSQGSC  | N  | EG--  | KGKCYL | KLSSNGSPTR  |
| Otter             | CHSSFYHNTD | FLGEELD | VD  | AKGHEA  | CQKM | CTDAIRC | CQFF | TYSPSPESC  | N  | EG--  | KGKCYL | KLSSNGSPTK  |
| Naked Mole Rat    | CHSSFYLDTD | FLGEELD | VD  | VKGHEA  | CQKM | CTNAIRC | CQFF | TYSPPPQESC | N  | ER--  | KGKCYL | KLSSNGSPTK  |
| Weddell Seal      | CHSSFYHNTD | FLGEELD | VD  | VKGHEA  | CQKM | CTDTIRC | CQFF | TYSPSPESC  | N  | GG--  | KGKCYL | KLSSNGSPTK  |
| Sea Lion          | CHSSFYHNTD | FLGEELD | VD  | AKGHEA  | CQKM | CTDTIRC | CQFF | TYSPSPESC  | N  | GG--  | KGKCYL | KLSSNGSPTK  |
| Elephant          | CHSSFYPNTD | FLGEELD | VD  | VEGREA  | CQKV | CTDTLRC | CQFF | TYSPSQPSN  |    | KG--  | KGKCYL | KLSSNGSPTK  |
| Lynx              | CHSSFYHNTD | FLGEELD | VD  | VKGHEA  | CQKM | CTDSIRC | CQFF | TYSPSPESC  | N  | GG--  | KGKCYL | KLSSNGSPTK  |
| Pangolin          | CHPSFYHNAD | FLGEELD | VE  | VKGHEA  | CQKA | CTNTIRC | CQFF | TYSPSQESC  | N  | GW--  | EGKCYL | KLSSANGSPTK |
| Groundhog         | CHSSFYHNTD | FLGEELD | VD  | VKGHEA  | CQKM | CTDVIRC | CQFF | TYSPPPQESC | H  | EK--  | KGKCYL | KLSSNGSPTK  |
| Spalax            | CHSSFYRNTD | FLGEELD | ID  | VKDHEA  | CQKM | CTNTIRC | CQFF | TYSPSQDSC  | N  | ER--  | KGKCYL | KLSSNGSPTR  |
| Degu              | CHSSFYRNTD | FLGEELD | VD  | VEDHEA  | CQKL | CTKAIRC | CQFF | TYLPPQESC  | K  | ER--  | KGKCYL | KLSSNGSPTK  |
| Walrus            | CHSSFYHNTD | FLGEELD | VD  | AKGHEA  | CQKM | CTDTIRC | CQFF | TYSPSPESC  | N  | GG--  | KGKCYL | KLSSNGSPTK  |
| White Tail Deer   | CHSSFYRNAD | FLGEELD | VD  | VKGHEA  | CQKT | CTNSIRC | CQFF | TYSPSQESC  | N  | GG--  | KGKCYL | KLSSANGSPTK |
| Aardvark          | CHSSFYHNID | FLGEELD | VD  | VEGREA  | CQKM | CTNAVR  | CQFF | TYSPPPQEP  | CN | KR--  | KGKCYL | KFSVNGSPTK  |
| Tiger             | CHSSFYHNTD | FLGEELD | VD  | VKGHEV  | CQKM | CTDSIRC | CQFF | TYSPSPESC  | N  | GG--  | KGKCYL | KLSSNGSPTK  |
| Domestic Cat      | CHSSFYHNTD | FLGEELD | VD  | VKGHEV  | CQKM | CTDSIRC | CQFF | TYSPSPESC  | N  | GG--  | KGKCYL | KLSSNGSPTK  |
| Shrew             | CHSSFYHNTD | FLGEELD | LD  | VKGHEA  | CQKI | CTNTVRC | CQFF | TYSPPIQKH  | C  | EG--  | KGKCYL | KLSSNGSPTK  |
| Meerkat           | CHPSFYHNTD | FLGEELD | VD  | VKGHGA  | CQKM | CTSSIRC | CQFF | TYSPSPESC  | N  | GG--  | KGKCYL | KLSSNGSPMK  |
| Wild Boar         | CHSSFYHNTD | FLGEELD | VD  | ENGHEA  | CQKT | CTNTIRC | CQFF | TYSPSQESC  | N  | GG--  | KGKCYL | KLSSNGSPTK  |
| Squirrel          | CHSSFYHNTD | FLGEELD | VD  | VKGHEA  | CQKM | CTDVIRC | CQFF | TYSPPPQESC | H  | EK--  | KGKCYL | KLSSNGSPTK  |
| Mink Whale        | CHSSFYRNTD | FLGEELD | VD  | VKGHEA  | CQKT | CTNSIRC | CQFF | TYSPSQESC  | N  | GG--  | KGKCYL | KLSSANGSPTK |
| Fin Whale         | CHSSFYRNTD | FLGEELD | VD  | VKGHEA  | CQKT | CTNSIRC | CQFF | TYSPSQESC  | N  | GG--  | KGKCYL | KLSSANGSPTK |
| Beluga Whale      | CHSSFYRNTD | FLGEELD | VD  | VKGHEA  | CQKT | CTNSIRC | CQFF | TYSPSQEPC  | N  | GG--  | KGKCYL | KLSSANGSPTK |
| Pilot Whale       | CHSSFYRNTD | FLGEELD | VD  | VKGHEA  | CQKT | CTNSIRC | CQFF | TYSPSQEPC  | N  | GG--  | KGKCYL | KLSSANGSPTK |
| Pacif. WS-Dolphin | CHSSFYRNTD | FLGEELD | VD  | VKGHEA  | CQKT | CTNSIRC | CQFF | TYSPSQEPC  | N  | GG--  | KGKCYL | KLSSANGSPTK |
| Baiji             | CHSSFYRNTD | FLGEELD | VD  | VKGHEA  | CQKT | CTNSIRC | CQFF | TYSPSQESC  | N  | GG--  | KGKCYL | KLSSANGSPTK |
| F'less Porpoise   | CHSSFYRNTD | FLGEELD | VD  | VKGHEA  | CQKT | CTNSIRC | CQFF | TYSPSQEPS  | N  | GG--  | KGKCYL | KLSSANGSPTK |
| Killer Whale      | CHSSFYRNTD | FLGEELD | VD  | VKGHEA  | CQKT | CTNSIRC | CQFF | TYSPSQEPC  | N  | GG--  | KGKCYL | KLSSANGSPTK |
| Sei Whale         | CHSSFYRNTD | FLGEELD | VD  | VKGHEA  | CQKT | CTNSIRC | CQFF | TYSPSQESC  | N  | GG--  | KGKCYL | KLSSANGSPTK |
| IPH Dolphine      | CHSSFYRNTD | FLGEELD | VD  | VKGHEA  | CQKT | CTNSIRC | CQFF | TYSPSQEPC  | N  | GG--  | KGKCYL | KLSSANGSPTK |
| Bot.Nose Dolphin  | CHSSFYHNTD | FLGEELD | VD  | VKGHEA  | CQKT | CTNSIRC | CQFF | TYSPSQEPC  | N  | GG--  | KGKCYL | KLSSANGSPTK |
| Opossum           | CHASIYYNTD | FLGEELD | IFE | VKDHSAC | QES  | CTNTIRC | CQFF | TYSPPGET   | CN | KE--  | KGKCYL | KMSSNGSPSK  |
| Koala             | CHGTIYANTD | FLGEELD | IFE | VEGHKAC | QER  | CTDTIRC | CQFF | TYSPTKETY  | N  | KG--  | KGKCYL | KMSLNGSPNK  |
| Wombat            | CHGSIYNTD  | FLGEELD | IFE | VKGHKAC | QER  | CTDTIRC | CQFF | TFSPTKETY  | N  | KG--  | KGKCYL | KMSLNGSPTK  |
| Tasmanian Devil   | CHGSVYSNTD | FLGEELD | IFE | VKDHTTC | QER  | CTDTIRC | CQFF | TYSPSGETY  | N  | KG--  | KGKCYL | KMSSNGSPIK  |
| Platypus          | CHPSLYSDTD | FLGLELD | VAY | ANGPAA  | CQKL | CTDVAR  | CQFF | THSPLHQAD  | N  | PR--  | RGKCSL | KMSSNGSPSK  |
| Echidna           | XXXXXXXXTD | FLGSELV | VAY | ANGPAA  | CQKL | CTDVDR  | CQFF | IASAC      | SR | PR--  | RGKCSL | KMSSDGSPSK  |



Supplemental Figure 14. Comparison of Factor XI A4 and Activation Cleavage Site Sequences (continued).

|                   | 343        |            |      | 368        |            |            | 399       |
|-------------------|------------|------------|------|------------|------------|------------|-----------|
| Human             | ILHGRGGISG | YTLRLCKMDN | ---- | ECTTKIKPRI | VGGTASVRGE | WPWQVTLHHT | SPTQRHLG  |
| Mouse             | ILHGRGGISG | YSLRLCKMDN | ---- | VCTTKINPRV | VGGAASVHGE | WPWQVTLHIS | ---QGHLCG |
| White Foot Mouse  | ILHGRGGISG | YTLRLCKMDN | ---- | VCTTKIKPRI | VGGTASVHGE | WPWQVTLHIS | SPVQGHLCG |
| Deer Mouse        | ILHGRGGISG | YTLRLCKMDN | ---- | VCTTKIKPRI | VGGTASVHGE | WPWQVTLHIT | SPVQGHLCG |
| Rabbit            | ILHGRGGISG | YTLRLCKMDN | ---- | VCTTKIKPRI | VGGSASLPE  | WPWQVTLHTV | SPTQRHLG  |
| Dog               | ILHGRGGISG | YTLRLCKMDN | ---- | VCTTKIKPRI | VGGTASVHGE | WPWQITLHHT | SPIRRHLG  |
| Red Fox           | ILHGRGGISG | YTLRLCKMDN | ---- | VCTTKIKPRI | VGGTASVHGE | WPWQITLHHT | SPIRRHLG  |
| Horse             | ILYGRGGISG | YTLRLCKMDN | ---- | ACTTKIKPRV | VGGRASVPGE | WPWQITLHII | SPTQKHLG  |
| Prezwalksi Horse  | ILYGRGGISG | YTLRLCKMDN | ---- | ACTTKIKPRV | VGGRASVPGE | WPWQITLHII | SPTQKHLG  |
| Yak               | ILHGTGSISG | YTLRLCKMDN | ---- | VCTTKIKTRI | VGGTRSVHGE | WPWQITLHVT | SPTQRHLG  |
| Cattle            | ILHGTGSISG | YTLRLCKMDN | ---- | VCTTKIKTRI | VGGTQSVHGE | WPWQITLHVT | SPTQRHLG  |
| Giant Panda       | ILHGRGGISG | YTLRLCKMDN | ---- | ECTTKIKPRI | VGGTASVHGE | WPWQITLHHT | SPTQRHLG  |
| Grizzly Bear      | ILHGRGGISG | YTLRLCKMDN | ---- | ECTTKIKPRI | VGGTASVHGE | WPWQITLHHT | SPTQRHLG  |
| Polar Bear        | ILHGRGGISG | YTLRLCKMDN | ---- | ECTTKIKPRI | VGGTASVHGE | WPWQITLHHT | SPTQRHLG  |
| Cheetah           | ILHGRGGISG | YTLRLCKMDN | ---- | VCTTKIKPRI | VGGEASVHGE | WPWQITLHIT | SPAQRHLG  |
| Dromedary         | ILRGRGSISG | YTLRLCKMDN | ---- | ACTTKIKPRI | VGGTESVHGE | WPWQITLHIT | SPTQRHLG  |
| Beaver            | ILHGRGGISG | YTLRLCKMDN | ---- | VCTTKIKPRI | IGGSPSVHGE | WPWQVTLHIT | SPTQRHLG  |
| Guinea Pig        | ILRGRGSISG | YTLRLCKMDN | ---- | VCTTKIKARI | VGGTVSLRGE | WPWQITLHIT | KPIQRHLG  |
| Rhinoceros        | ILHGRGGISG | YTLRLCKMDN | ---- | ACTTKIKPRV | VGGRASVSGE | WPWQITLHVT | SPTQRHLG  |
| Star Nosed Mole   | ILHGRGGISG | YTLRLCKMDN | ---- | VCTTKVKSRI | VGGTASGFGE | WPWQVTLHIS | SPTQRHLG  |
| Chinese Hamster   | ILHGQGGISG | YTLRLCKMDN | ---- | VCTTKIKPRV | VGGTASVHGE | WPWQVSLHIT | SPTQGHLCG |
| Otter             | ILHGRGGISG | YTLRLCKMDN | ---- | VCTTKIKPRI | VGGTASVHGE | WPWQITLQIT | SPSQRHLG  |
| Naked Mole Rat    | ILHGRGGISG | YTLRLCKMDN | ---- | ICTTKIKPRI | VGGTVSVRGE | WPWQITLHIT | APSRHLG   |
| Weddell Seal      | ILHGRGGISG | YTLRLCKMDN | ---- | ECTTKIKPRI | VGGTASVPGE | WPWQITLHIT | SPTQRHLG  |
| Sea Lion          | ILHGRGGISG | YTLRLCKMDN | 18-- | ECTTKIKPRI | VGGTASVPGE | WPWQITLHIT | SPTQRHLG  |
| Elephant          | ILHGRGGISG | YTLRLCKMDN | ---- | VCTNRINARI | VGGTASVYSE | WPWQITLHHT | SPTQRHLG  |
| Lynx              | ILHGRGGISG | YTLRLCKMDN | ---- | VCTTKIKPRI | VGGEASVHGE | WPWQITLHIT | SPAQRHLG  |
| Pangolin          | ILYGRGGISG | YTLRLCKMDN | ---- | ECTTKIKPRI | VGGTGSAPGE | WPWQVTLHMT | EPTQRHLG  |
| Groundhog         | ILHGRGGISG | YTLRLCKMDN | ---- | ECTTKIKPRI | VGGTASVQGE | WPWQVTLHVI | SPIQRHLG  |
| Spalax            | ILHGRGGISG | YTLRLCKMDN | ---- | ECTTKIKSRI | VGGTASVHGE | WPWQVSLHHT | SPTQRHLG  |
| Degu              | ILHGTGSISG | YTLRLCKMDN | ---- | ICTTKIKPRI | VGGTSLVRGE | WPWQITLHIT | APIRGHLG  |
| Walrus            | ILHGRGGISG | YTLRLCKMDN | ---- | ECTTKIKPRI | VGGTASVPGE | WPWQITLHIT | SPTQRHLG  |
| White Tail Deer   | ILHGTGSISG | YTLRLCKMDN | ---- | VCTTKIKARI | VGGTQSVHGE | WPWQITLHVI | SPTQRHLG  |
| Aardvark          | ILHGRGGISG | YTLRLCKMDN | ---- | VCTTKINPRI | VGGTASVYGE | WPWQITLHIT | SPTQRHLG  |
| Tiger             | ILHGRGGISG | YTLRLCKMDN | ---- | VCTTKIKPRI | VGGEASVHGE | WPWQITLHIT | SPAQRHLG  |
| Domestic Cat      | ILHGRGGISG | YTLRLCKMDN | ---- | VCTTKIKPRI | VGGEASVHGE | WPWQITLHIT | SPAQRHLG  |
| Shrew             | ILHGRGGISG | YTLRLCKMDN | ---- | ECTTKIKPRI | VGGTASVSGE | WPWQITLHIT | SPTQRHLG  |
| Meerkat           | ILHGRGGISG | YTLRLCKMDN | GDKS | TCTTKIKPRI | VGGEASVHGE | WPWQVTLHIT | SPTRRHLG  |
| Wild Boar         | ILHGRGSISG | YTLRLCKMDN | ---- | ACTTKIKPRI | VGGTKSVLGE | WPWQITVHIT | SPTQRHLG  |
| Squirrel          | ILHGRGGISG | YTLRLCKMDN | ---- | ECTTKIKPRI | VGGTASVQGE | WPWQVTLHVM | XPIQRHLG  |
| Mink Whale        | ILNGRGNISG | YTLRLCKMDN | ---- | ACTTKIKPRI | VGGTKSVLGE | WPWQITLHIT | SPTQRHLG  |
| Fin Whale         | ILHGRGNISG | YTLRLCKMDN | ---- | ACTTKIKPRI | VGGTKSVLGE | WPWQITLHIT | SPTQRHLG  |
| Beluga Whale      | ILHGRGNISG | YTLRLCKMDN | ---- | ACTTKIKPRI | VGGTKSVLGE | WPWQITLYIT | SPTQRHLG  |
| Pilot Whale       | ILHGRGNISG | YTLRLCKMDN | ---- | ACTTKIKPRI | VGGTKSVLGE | WPWQITLYIT | SPTQRHLG  |
| Pacif. WS-Dolphin | ILHGRGNISG | YTLRLCKMDN | ---- | ACTTKIKPRI | VGGTKSVLGE | WPWQITLYIT | SPTQRHLG  |
| Baiji             | ILHGRGNISG | YTLRLCKMDN | ---- | ACTTKIKPRI | VGGTKSVLGE | WPWQITLYIT | SPTQRHLG  |
| F'less Porpoise   | ILHGRGNISG | YTLRLCKMDN | ---- | ACTTKIKPRI | VGGTKSVLGE | WPWQITLYIT | SPTQRHLG  |
| Killer Whale      | ILHGRGNISG | YTLRLCKMDN | ---- | ACTTKIKPRI | VGGTKSVLGE | WPWQITLYIT | SPTQRHLG  |
| Sei Whale         | ILHGRGNISG | YTLRLCKMDN | ---- | ACTTKIKPRI | VGGTKSVLGE | WPWQITLHIT | SPTQRHLG  |
| IPH Dolphine      | ILHGRGNISG | YTLRLCKMDN | ---- | ACTTKIKPRI | VGGTKSVLGE | WPWQITLYIT | SPTQRHLG  |
| Bot.Nose Dolphin  | ILHGRGNISG | YTLRLCKMDN | ---- | ACTTKIKPRI | VGGTKSVLGE | WPWQITLYIT | SPTQRHLG  |
| Opossum           | IIHGKGGISG | YTLRLCKMEN | ---- | ACTNKIKGKI | VGGTKSVLAE | WPWQVSLHIT | SPIQKHLG  |
| Koala             | ILHGRGGISD | YTLRLCKMEN | ---- | ACTNKIKAKI | VGGTNSVLAE | WPWQVSLYVT | SPIQKHLG  |
| Wombat            | ILHGRGGISG | YTLRLCKMEN | ---- | ACTNKIKAKI | VGGTNSVLAE | WPWQVSLHVT | SPIQKHLG  |
| Tasmanian Devil   | ILHGRGGVSG | YTLRLCKMEN | ---- | ACTNKIKAKI | VGGTNSVLAE | WPWQISLHVT | FPIQKHLG  |
| Platypus          | IVYGRGGISG | YTLRLCKMDN | ---- | VMTKIRSRV  | VGGVRSARGE | WPWQVSLQVV | QPRQKHLG  |
| Echidna           | IVYGRGGISG | YTLRLCKMDN | ---- | XCTMKIRSRV | VGGEGSVRGE | WPWQVSLQVV | QPRQRHLG  |

**Supplemental Figure 15. Specific Activities of Factor XI/Prekallikrein Chimeras.** Human fXI-deficient plasma (30  $\mu$ l) was mixed with 30  $\mu$ l of Tris-buffered saline containing recombinant wild type fXI (fXI-WT,  $\Delta$ ), fXI with an A3 domain from platypus fXI (fXI-*PlatXIA3*,  $\diamond$ ), fXI with an A3 domain from human PK (fXI-PKA3,  $\square$ ), and fXI with an A3 domain from platypus PK (fXI-*PlatPKA3*,  $\circ$ ) at various concentrations (listed at the bottom of the graph), and 30  $\mu$ l of silica-based aPTT reagent. After incubation for 5 min at 37  $^{\circ}$ C, 30  $\mu$ l of 25 mM  $\text{CaCl}_2$  was added and time to clot formation was recorded on an ST4 coagulation analyzer (Diagnostica Stago). Results of clotting time in seconds are plotted against recombinant fXI concentration on a log-log plot. The specific activity of fXI-WT (200 units/mg) was arbitrarily assigned a value of 100% for the purpose of comparison to the other recombinant proteins. Estimated specific activities were determined by drawing a line for the results for 1.25  $\mu$ g/ml of recombinant protein horizontally to the point where it intersects the curve for fXI-WT.

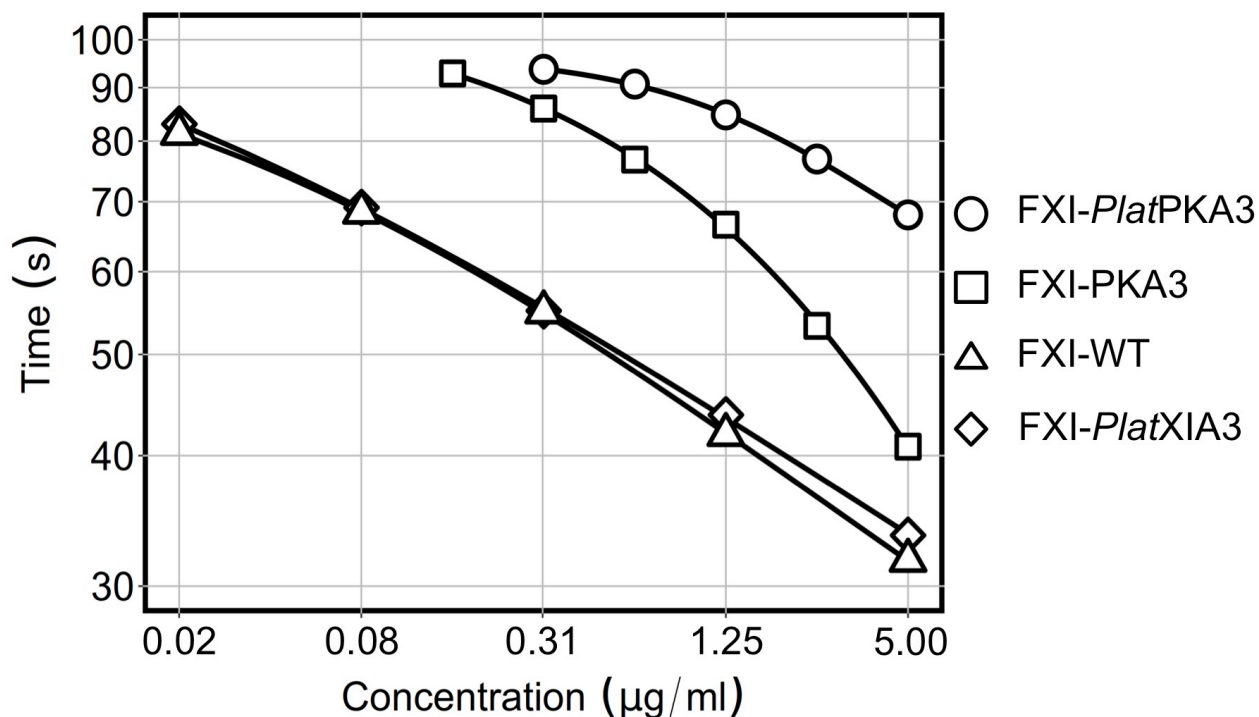

Supplement: advancesADV2020002456-suppl1.pdf [file advancesADV2020002456-suppl1.pdf]
